# Supplementary material
Source: PubMed Central journal article supplement (PMC4322187)

# THE LANCET

## **Supplementary appendix**

This appendix formed part of the original submission and has been peer reviewed. We post it as supplied by the authors.

Supplement to: Swerdlow DI, Preiss D, Kuchenbaecker KB, et al. HMG-coenzyme A reductase inhibition, type 2 diabetes, and bodyweight: evidence from genetic analysis and randomised trials. *Lancet* 2014; published online Sept 24. [http://dx.doi.org/10.1016/S0140-6736\(14\)61183-1](http://dx.doi.org/10.1016/S0140-6736(14)61183-1).

# HMG-CoA reductase inhibition, type 2 diabetes and body weight: evidence from genetic analysis and randomized trials

## Web appendix

Swerdlow DI, Preiss D, Kuchenbaecker KE, Holmes MV *et al.*

### Table of Contents

|                                                                                                                                                                                                                      |           |
|----------------------------------------------------------------------------------------------------------------------------------------------------------------------------------------------------------------------|-----------|
| <b>Supplementary methods</b>                                                                                                                                                                                         | <b>3</b>  |
| <b>Supplementary results</b>                                                                                                                                                                                         | <b>9</b>  |
| <b>Acknowledgements</b>                                                                                                                                                                                              | <b>17</b> |
| <b>Funding information</b>                                                                                                                                                                                           | <b>19</b> |
| <b>Supplementary tables and figures</b>                                                                                                                                                                              | <b>22</b> |
| <i>Supplementary Table 1 - SNPs within 55kb of HMGCR on the Cardiochip platform and their associations with LDL-C in the Whitehall II study</i>                                                                      | 23        |
| <i>Supplementary Table 2 - Genotype information for studies contributing individual participant-level data</i>                                                                                                       | 25        |
| <i>Supplementary Table 3 - Collaborating genetic study characteristics</i>                                                                                                                                           | 27        |
| <i>Supplementary Table 4 - Data availability for biomarkers and events in studies contributing to the primary genetic analysis</i>                                                                                   | 29        |
| <i>Supplementary Table 5 - Clinical outcome definitions</i>                                                                                                                                                          | 31        |
| <i>Supplementary Table 6 - Associations of HMGCR rs17238484 with biomarkers and T2D risk in pre-specified subgroups.</i>                                                                                             | 32        |
| <i>Supplementary Table 7 - Associations of HMGCR rs12916 with plasma lipids, T2D-related biomarkers and T2D risk – fixed effects meta-analysis</i>                                                                   | 33        |
| <i>Supplementary Table 8 - Associations of rs17238484 and rs12916 with T2D-related biomarkers and T2D risk - random effects meta-analyses</i>                                                                        | 34        |
| <i>Supplementary Table 9 - Effect of statin therapy on body weight and new-onset T2D risk– fixed effects meta-analysis</i>                                                                                           | 35        |
| <i>Supplementary Table 10 - Associations of HMGCR rs17238484 and rs12916 with T2D risk in 35 studies contributing to this analysis, and in combination with data from GWA study data from the DIAGRAM consortium</i> | 36        |
| <i>Supplementary Figure 1 - Associations of SNPs at the HMGCR locus with LDL-C concentration and liver gene expression</i>                                                                                           | 37        |
| <i>Supplementary Figure 2 - Effect of HMGCR rs12916 genotype on liver expression of HMGCR</i>                                                                                                                        | 38        |
| <i>Supplementary Figure 3 - Genetic analysis biomarker data - box and whisker plots</i>                                                                                                                              | 39        |

|                                                                                                                                                                |    |
|----------------------------------------------------------------------------------------------------------------------------------------------------------------|----|
| <i>Supplementary Figure 4 – Meta-regression model of the relationship between new-onset diabetes and percentage LDL-C reduction in statin trials at 1 year</i> | 45 |
| <i>Supplementary Figure 5 – Meta-regression model of the relationship between change in weight and relative change in LDL-C in statin trials at 1 year</i>     | 46 |

## Supplementary methods

### *Genetic studies - datasets contributing to analysis*

**Supplementary Table 3** describes the details of studies contributing individual participant-level data (IPD) to the genetic analysis. The participating studies are detailed below.

#### - Prospective cohort studies

Twenty-five prospective cohort studies (including birth cohorts) contributed genotype and phenotype (either biomarkers, clinical events, or both) data to the genetic analysis. The designs of these studies have been described previously.

From the UCL-LSHTM-Edinburgh-Bristol (UCLEB) Consortium: British Regional Heart Study (BRHS)<sup>1</sup>, the British Women's Heart and Health Study (BWHHS)<sup>2</sup>, the Caerphilly Prospective Study (CaPS)<sup>3</sup>, the Edinburgh Artery Study (EAS)<sup>4</sup>, the English Longitudinal Study of Aging (ELSA)<sup>5</sup>, the Edinburgh Type 2 Diabetes Study (ET2DS)<sup>6</sup>, the Northwick Park Heart Study II (NPHS-II)<sup>7</sup>, the Whitehall-II (WHII) study<sup>8</sup>, and the MRC National Survey of Health and Development (MRC NSHD, 1946 British Birth Cohort)<sup>9</sup>.

From the National Heart, Lung and Blood Institute (NHLBI) Candidate Gene Association Resource (CARE) Consortium: the Atherosclerosis Risk in Communities Study (ARIC)<sup>10</sup>, the Coronary Artery Risk Development in Young Adults (CARDIA) Study<sup>11</sup>, the Cleveland Family Study (CFS)<sup>12,13</sup>, the Cardiovascular Health Study (CHS)<sup>14</sup>, the Framingham Heart Study (FHS)<sup>15</sup>, and the Multi-Ethnic Study of Atherosclerosis (MESA)<sup>16</sup>.

From the Health, Alcohol and Psychosocial factors In Eastern Europe (HAPIEE) study<sup>17</sup>: the Czech Republic (HAPIEE-CZ), Lithuania (HAPIEE-LT), Poland (HAPIEE-PL) and Russia (HAPIEE-RU) arms of the study.

Also, the Copenhagen City Heart Study (CCHS)<sup>18</sup>, the MRC Ely Cohort<sup>19</sup>, the MRC Fenland Cohort<sup>20</sup>, the IMPROVE study<sup>21</sup>, the Prevention of Renal and Vascular Endstage Disease Study (PREVEND)<sup>22</sup>, and the Second Manifestations of Arterial Disease (SMART) Study<sup>23</sup>.

#### - Case-control and case-cohort studies

Three nested case-control studies were included - the InterAct consortium of studies<sup>24</sup>, the Utrecht Cardiovascular Pharmacogenetics study (UCP)<sup>25</sup> and the Women's Health Initiative (WHI)<sup>26</sup>.

#### - Intervention trials

Five RCT studies were included - the Aspirin in Asymptomatic Atherosclerosis (AAA) trial<sup>27</sup>, the Justification for the Use of Statins in Prevention: an Intervention Trial Evaluating Rosuvastatin (JUPITER) trial<sup>28</sup>, the PROSPER trial follow-up study<sup>29</sup>, the Thrombosis Prevention Trial follow-up study (TPT)<sup>30</sup>, and the Women's Genome Health Study (WHGS)<sup>31</sup>. These trials were treated as prospective cohorts for the purposes of these analyses.

- GWA studies

Two GWA study consortia contributed data.

Data from the Meta-Analysis of Glucose and Insulin-related traits Consortium (MAGIC) were included in the form of single-SNP lookups<sup>1</sup>. Estimates of the association between the lead *HMGCR* SNPs and fasting insulin were extracted from analysis using the Illumina MetaboChip SNP genotyping platform.

An estimate of the association of the lead *HMGCR* SNPs with body weight were accessed from publicly available data from the Genetic Investigation of Anthropometric Traits (GIANT) Consortium<sup>32</sup> at <http://csg.sph.umich.edu/locuszoom/> (Accessed 11 August 2011).

From the Diabetes Genetics Replication and Meta-analysis (DIAGRAM) Consortium<sup>33</sup>, we included the following studies: deCODE<sup>34,35</sup>, the Diabetes Gene Discovery Group (DGDG)<sup>36</sup>, the Diabetes Genetics Initiative (DGI)<sup>36,37</sup>, the European Special Population Network (EUROSPAN)<sup>37-40</sup>, the Cooperative Health Research in the Region of Augsburg, Southern Germany Study (KORAGEN)<sup>41-43</sup>, the Rotterdam Study<sup>44</sup>, and the Wellcome Trust Case-Control Consortium (WTCCC)<sup>45</sup>.

#### *Genetic studies - Biomarker measurement and definitions*

Availability of biomarker data in genetic studies is detailed in **Supplementary Table 4**.

All biomarkers were measured using validated protocols and assays reported previously. Biomarker data used in the present analyses were taken from either the baseline phase of data collection in each study, or the next phase soonest after baseline at which data on the greatest number of biomarkers were available. Where certain biomarker variables were unavailable at the principal survey phase, they were included from closest subsequent phase with data available.

In some studies (BRHS, HAPIEE-Russia, HAPIEE-Lithuania, HAPIEE-Poland, HAPIEE-Czech Republic, CaPS and Whitehall II), LDL-cholesterol (LDL-C) concentration was not measured directly but was derived using the Friedewald formula<sup>46</sup>. In studies where data on total, LDL- and non-HDL-cholesterol were available in units of mg/L, these variables were converted to mmol/L using a multiplication factor of 0.02586.

#### *Genetic studies - T2DM clinical outcome*

Definitions of T2D cases differed between studies. Common definitions were therefore set in order to accommodate data from as many studies as possible whilst avoiding reporting or measurement bias. Studies used validated biochemical criteria or physician diagnosis, and others self-report to identify T2D cases (details are given in **Supplementary Table 5**). We included all T2D cases, although, where possible, unvalidated self-reported cases were excluded.

In the majority of studies, the type of diabetes mellitus (DM) - i.e. type 1, type 2 or others - was not recorded. However, given the relative preponderance of type 2 DM in the general population and the mean age of study participants, we assumed that the overwhelming majority of cases were T2D. In ET2DS, where all participants were diabetic, individuals free from T2D from EAS were used as controls. EAS was selected as the most appropriate source of controls since its participants were recruited from the same area of Scotland as those in ET2DS.

#### *Genetic studies - SNP selection*

The aim of the SNP selection process was to identify a minimal set of variants with associations with LDL-C concentration that were both statistically strong and of greatest possible magnitude. Moreover, the highest possible minor allele frequency (MAF) was sought to increase the power of the analysis. To identify suitable SNPs for use as instruments in this analysis, 4,678 individuals in the Whitehall II study (an observational longitudinal study of UK civil servants) were genotyped using the IBC HumanCVD BeadChip (Cardiochip), a gene-centric platform including c. 48,000 SNPs in around 2,100 genes implicated in CVD<sup>47</sup>.

Associations of the 38 SNPs included on the array at the *HMGCR* locus with LDL-C concentration were estimated using univariate linear regression models in PLINK<sup>48</sup>. We evaluated suitability of SNPs at the *HMGCR* locus for inclusion based on these parameters: i) p-value  $<1 \times 10^{-5}$  for association with LDL-C; ii) linkage disequilibrium (LD) between SNPs assessed using data from the 1000 Genomes Project Pilot 1 (using SNAP pairwise LD tool - [www.broadinstitute.org/mpg/snap/](http://www.broadinstitute.org/mpg/snap/)); and, iii) a minor allele frequency (MAF)  $\geq 20\%$ . Within the 38 SNPs at the *HMGCR* locus included on the Cardiochip, we retained only one SNP from groups in strong LD ( $r^2 > 0.85$ ) (**Supplementary Table 1**). Two SNPs, rs17238484 and rs12916 (between-SNP LD  $R^2 = 0.37$ ) were selected for analysis in the collaborating studies, with the rs17238484 SNP designated the lead variant. Both rs17238484<sup>49</sup> and rs12916<sup>50</sup> have previously been associated with plasma LDL-C at a genome-wide level of statistical significance. Genotype data in collaborating studies were excluded if the allele call rate was  $< 90\%$  or the Hardy-Weinberg equilibrium (HWE) p-value was  $< 1 \times 10^{-5}$  (**Supplementary Table 2**).

To confirm the influence of *HMGCR* mRNA transcript levels on LDL, we carried out imputation and eQTL analysis of a liver gene expression dataset and genotypes for 966 human liver samples of unrelated European-Americans<sup>51</sup>. Colocalisation analysis was run using the liver eQTL data together with LDL summary data from a publicly available meta-analysis of LDL in more than 100,000 individuals of European ancestry<sup>50</sup>, as previously described (<http://arxiv.org/abs/1305.4022>).

In studies where the lead *HMGCR* SNPs were not directly genotyped, proxy SNPs were used in the analysis. Proxies were defined on the basis of their LD with each lead SNP, with a threshold of  $r^2 > 0.85$ .

#### *Genetic studies - genotyping and genotype data quality control*

Genotypes were coded as 0 (GG), 1 (GT), and 2 (TT) and included in regression models as the predictor (independent) variable. Since this coding assumes the T allele to be the effect allele, the sign of regression model beta-coefficients was inverted in order to present the effect of G allele carriage. Existing genotype data were used where available, and new genotyping commissioned where necessary. Details of genotyping platforms and data quality control are shown in

#### **Supplementary Table 2.**

#### *Genetic studies - statistical analysis*

##### - Participant inclusion and relatedness

Only individuals with data available on the lead *HMGCR* SNPs (or their proxies) and at least one phenotype (biomarker or clinical endpoint) were included in the analysis. To avoid bias caused by relatedness, in studies where data on family structure were available, only the eldest member of a group of related individuals was included.

##### - Associations of *HMGCR* genotype with biomarkers

Mean differences in biomarkers between genotype classes were estimated using the 'metan' command in Stata v11.2 (Stata Corp., College Station, Texas), using an inverse-variance fixed effects meta-analysis model. For  $\log_e$  biomarker variables, the summary meta-analysis estimate was exponentiated and subtracted from 1 to yield a proportional difference in geometric means between genotype classes. The Stata 'regress' command (or equivalent in other computer packages) was used to estimate the mean difference in biomarker level associated with carriage of each additional copy of the lead SNP effect allele. Here too, the proportional difference in geometric mean was estimated for  $\log_e$ -transformed variables the same technique. Within-study estimates of the per-allele SNP association with each biomarker were combined using inverse-variance fixed-effects meta-analysis.

##### - Subgroup analysis of SNP-biomarker associations

In order to assess potential effect modification or confounding in our estimates of genetic associations with biomarkers, we stratified the analysis according to a number of pre-specified subgroups. These were:

- i. Within-study tertiles of non-HDL-C (as a surrogate for LDL-C for data were available in a greater number of studies);
- ii. Users and non-users of lipid-lowering drugs;
- iii. Normal weight (BMI <25), overweight (BMI ≥25-<30) and obese (BMI ≥30) individuals;
- iv. Males and females; and,
- v. Individuals with and without prevalent or incident T2D

Biomarker associations were estimated as described above, and heterogeneity between subgroup strata assessed with meta-regression modelling of combined meta-analysis effect estimates (using the 'metareg' command in Stata). These models sought differences between binary subgroup strata, and evidence of linear association in subgroups with ≥3 strata.

- Associations of *HMGCR* genotype with T2D outcome

Where data were available, the association of the lead *HMGCR* SNPs with risk of prevalent and incident T2D was estimated under genotypic and additive models, similarly to the associations with biomarkers. Odds ratios (ORs) for rs17238484 GT vs TT and for GG vs TT genotype, and for rs12916 AA vs AG and AA vs GG were estimated using fixed effects Mantel-Haenszel meta-analysis (Stata 'metan' command). The OR per LDL-lowering allele for each SNP was estimated using logistic regression models within each study (Stata 'logit' command), and within-study estimates were combined using inverse-variance fixed effects meta-analysis in Stata, as above. Meta-analyses were repeated using a random effects model.

*Statin treatment trials included*

Trials of participants with organ transplants or on dialysis were excluded, as were those with differences in participant follow-up between treatment arms, or which investigated dual lipid-lowering therapy. These meta-analyses included data from 13 intervention trials comparing statin treatment with placebo (ten trials) or standard care (three trials)<sup>52</sup>, and from five trials comparing high- to moderate-dose statin treatment<sup>53</sup>, respectively. At the time of their publication, data were unavailable from three eligible trials (CARE<sup>54</sup>, SPARCL<sup>55</sup> and LIPS<sup>56</sup>). Data on new-onset T2D have subsequently been published for SPARCL<sup>57</sup>, and data for LIPS were made available by its industrial sponsor for the present analysis, which now includes 20 trials.

Below are the randomised statin trials included in the present analysis, with references to their respective published reports. The trials are listed in chronological order of publication:



Scandinavian Simvastatin Survival Study (4S)<sup>58</sup>  
West of Scotland Coronary Protection Study (WOSCOPS)<sup>59</sup>  
Air Force/Texas Coronary Atherosclerosis Prevention Study (AFCAPS TexCAPS)<sup>60</sup>  
Long-Term Intervention with Pravastatin in Ischaemic Disease Study (LIPID)<sup>61</sup>  
GISSI-Prevenzione<sup>62</sup>  
Lescol® Intervention Prevention Study (LIPS)<sup>63</sup>  
Heart Protection Study (HPS)<sup>64</sup>  
Pravastatin in elderly individuals at risk of vascular disease (PROSPER)<sup>65</sup>  
Antihypertensive and Lipid-Lowering Treatment to Prevent Heart Attack Trial - Lipid-lowering Treatment arm (ALLHAT-LLT)<sup>66</sup>  
Anglo-Scandinavian Cardiac Outcomes Trial--Lipid Lowering Arm (ASCOT-LLA)<sup>67</sup>  
Pravastatin or Atorvastatin Evaluation and Infection Therapy--Thrombolysis in Myocardial Infarction 22 (PROVE-IT TIMI 22)<sup>68</sup>  
A to Z Trial<sup>69</sup>  
Treating to New Targets Trial (TNT)<sup>70</sup>  
Incremental Decrease in End Points Through Aggressive Lipid Lowering Study (IDEAL)<sup>71</sup>  
Stroke Prevention by Aggressive Reduction in Cholesterol Levels Trial (SPARCL)<sup>55</sup>  
MEGA Trial<sup>72</sup>  
Controlled Rosuvastatin Multinational Trial in Heart Failure (CORONA)<sup>73</sup>  
GISSI-Heart Failure Trial (GISSI-HF)<sup>74</sup>  
Justification for the Use of Statins in Primary Prevention: An Intervention Trial Evaluating Rosuvastatin (JUPITER)<sup>75</sup>  
Study of the Effectiveness of Additional Reductions in Cholesterol and Homocysteine (SEARCH)<sup>76</sup>

*Statin treatment trials - T2D outcome definition*

Diagnostic criteria for T2D varied among the 20 contributing trials, but included one or more of, (i) physician-reported diagnosis of T2D; (ii) commencement of glucose-lowering medication; or, (iii) fasting glucose >7.0mmol/L (on at least one occasion; see **Table 1**); and (iv) T2D defined according to World Health Organisation 1999 criteria. In a subset of trials, T2D was diagnosed by the presence of elevated fasting glucose. In trials where plasma glucose was measured frequently, T2D was diagnosed after two elevated glucose readings, and after one in trials with less frequent testing.

## Supplementary results

### *HMGCR* SNP expression and co-localisation analysis

Co-localisation analysis yields a high probability of a shared signal for the eQTL in *HMGCR* and LDL-C lipid biomarkers, suggesting that *HMGCR* gene expression mediates the LDL signal (**Supplementary Figure 2**). Extensive linkage disequilibrium at the eQTL signal, however, limits the power of co-localisation analysis at this locus. The fact that other genes 1Mb around the *HMGCR* gene have a probability of co-localisation less than 3% increases the probability that *HMGCR* is the gene responsible for the LDL signal.

The T allele of rs12916 is associated with lower expression of *HMGCR* in the liver (effect = 0.054, standard error=0.012;  $p=1.30 \times 10^{-5}$ ; MAF = 0.39, imputation  $R^2= 0.99$ ). Out of all the SNPs used in the co-localisation analysis, rs12916 was the SNP with the highest probability of driving the shared association between eQTL and LDL-C (54%, see **Supplementary Figure 1**). Data were unavailable in the dataset for the *HMGCR* rs17238484 SNP or its proxies.

- 1 Walker M, Whincup PH, Shaper AG. The British Regional Heart Study 1975-2004. *Int J Epidemiol* 2004; **33**: 1185–92.
- 2 Lawlor DA, Bedford C, Taylor M, Ebrahim S. Geographical variation in cardiovascular disease, risk factors, and their control in older women: British Women's Heart and Health Study. *J Epidemiol Community Health* 2003; **57**: 134–40.
- 3 Caerphilly and Speedwell Collaborative Group. Caerphilly and Speedwell collaborative heart disease studies. The Caerphilly and Speedwell Collaborative Group. *J Epidemiol Community Health* 1984; **38**: 259–62.
- 4 Fowkes FG, Housley E, Cawood EH, Macintyre CC, Ruckley CV, Prescott RJ. Edinburgh Artery Study: prevalence of asymptomatic and symptomatic peripheral arterial disease in the general population. *Int J Epidemiol* 1991; **20**: 384–92.
- 5 Steptoe A, Breeze E, Banks J, Nazroo J. Cohort Profile: The English Longitudinal Study of Ageing. *Int J Epidemiol* 2012. doi:10.1093/ije/dys168.
- 6 Price JF, Reynolds RM, Mitchell RJ, *et al*. The Edinburgh Type 2 Diabetes Study: study protocol. *BMC Endocr Disord* 2008; **8**: 18.
- 7 Miller GJ, Bauer KA, Barzegar S, *et al*. The effects of quality and timing of venepuncture on markers of blood coagulation in healthy middle-aged men. *Thromb Haemost* 1995; **73**: 82–6.
- 8 Marmot M, Brunner E. Cohort Profile: the Whitehall II study. *Int J Epidemiol* 2005; **34**: 251–6.
- 9 Wadsworth M, Kuh D, Richards M, Hardy R. Cohort Profile: The 1946 National Birth Cohort (MRC National Survey of Health and Development). *Int J Epidemiol* 2006; **35**: 49–54.
- 10 ARIC Investigators. The Atherosclerosis Risk in Communities (ARIC) Study: design and objectives. The ARIC investigators. *Am J Epidemiol* 1989; **129**: 687–702.
- 11 Friedman GD, Cutter GR, Donahue RP, *et al*. CARDIA: study design, recruitment, and some characteristics of the examined subjects. *J Clin Epidemiol* 1988; **41**: 1105–16.
- 12 Redline S, Tishler PV, Tosteson TD, *et al*. The familial aggregation of obstructive sleep apnea. *Am J Respir Crit Care Med* 1995; **151**: 682–7.
- 13 Buxbaum SG, Elston RC, Tishler PV, Redline S. Genetics of the apnea hypopnea index in Caucasians and African Americans: I. Segregation analysis. *Genet Epidemiol* 2002; **22**: 243–53.
- 14 Fried LP, Borhani NO, Enright P, *et al*. The Cardiovascular Health Study: design and rationale. *Ann Epidemiol* 1991; **1**: 263–76.

- 15 Dawber TR, Meadors GF, Moore FE Jr. Epidemiological approaches to heart disease: the Framingham Study. *Am J Public Health Nations Health* 1951; **41**: 279–81.
- 16 Bild DE, Bluemke DA, Burke GL, *et al.* Multi-ethnic study of atherosclerosis: objectives and design. *Am J Epidemiol* 2002; **156**: 871–81.
- 17 Peasey A, Bobak M, Kubinova R, *et al.* Determinants of cardiovascular disease and other non-communicable diseases in Central and Eastern Europe: rationale and design of the HAPIEE study. *BMC Public Health* 2006; **6**: 255.
- 18 Frikke-Schmidt R, Nordestgaard BG, Stene MCA, *et al.* Association of loss-of-function mutations in the ABCA1 gene with high-density lipoprotein cholesterol levels and risk of ischemic heart disease. *JAMA* 2008; **299**: 2524–32.
- 19 Williams DR, Wareham NJ, Brown DC, *et al.* Undiagnosed glucose intolerance in the community: the Isle of Ely Diabetes Project. *Diabet Med* 1995; **12**: 30–5.
- 20 Medical Research Council. MRC Fenland Study. MRC Fenland Study. 2010.<http://www.mrc-epid.cam.ac.uk/Research/Studies/Fenland/index.html> (accessed 25 Oct2010).
- 21 Baldassarre D, Nyssönen K, Rauramaa R, *et al.* Cross-sectional analysis of baseline data to identify the major determinants of carotid intima-media thickness in a European population: the IMPROVE study. *Eur Heart J* 2010; **31**: 614–22.
- 22 Diercks GF, Janssen WM, van Boven AJ, *et al.* Rationale, design, and baseline characteristics of a trial of prevention of cardiovascular and renal disease with fasinopril and pravastatin in nonhypertensive, nonhypercholesterolemic subjects with microalbuminuria (the Prevention of RENal and Vascular ENdstage Disease Intervention Trial [PREVEND IT]). *Am J Cardiol* 2000; **86**: 635–8.
- 23 Simons PC, Algra A, van de Laak MF, Grobbee DE, van der Graaf Y. Second manifestations of ARTERial disease (SMART) study: rationale and design. *Eur J Epidemiol* 1999; **15**: 773–81.
- 24 InterAct Consortium, Langenberg C, Sharp S, *et al.* Design and cohort description of the InterAct Project: an examination of the interaction of genetic and lifestyle factors on the incidence of type 2 diabetes in the EPIC Study. *Diabetologia* 2011; **54**: 2272–82.
- 25 Peters BJM, Pett H, Klungel OH, *et al.* Genetic variability within the cholesterol lowering pathway and the effectiveness of statins in reducing the risk of MI. *Atherosclerosis* 2011; **217**: 458–64.
- 26 Anderson GL, Manson J, Wallace R, *et al.* Implementation of the Women's Health Initiative study design. *Ann Epidemiol* 2003; **13**: S5–17.

- 27 Fowkes FGR, Price JF, Stewart MCW, *et al.* Aspirin for prevention of cardiovascular events in a general population screened for a low ankle brachial index: a randomized controlled trial. *JAMA* 2010; **303**: 841–8.
- 28 Ridker PM, JUPITER Study Group. Rosuvastatin in the primary prevention of cardiovascular disease among patients with low levels of low-density lipoprotein cholesterol and elevated high-sensitivity C-reactive protein: rationale and design of the JUPITER trial. *Circulation* 2003; **108**: 2292–7.
- 29 Shepherd J, Blauw GJ, Murphy MB, *et al.* The design of a prospective study of Pravastatin in the Elderly at Risk (PROSPER). PROSPER Study Group. PROspective Study of Pravastatin in the Elderly at Risk. *Am J Cardiol* 1999; **84**: 1192–7.
- 30 MRC GPRF. Thrombosis prevention trial: randomised trial of low-intensity oral anticoagulation with warfarin and low-dose aspirin in the primary prevention of ischaemic heart disease in men at increased risk. The Medical Research Council's General Practice Research Framework. *Lancet* 1998; **351**: 233–41.
- 31 Ridker PM, Chasman DI, Zee RYL, *et al.* Rationale, design, and methodology of the Women's Genome Health Study: a genome-wide association study of more than 25,000 initially healthy american women. *Clin Chem* 2008; **54**: 249–55.
- 32 Speliotes EK, Willer CJ, Berndt SI, *et al.* Association analyses of 249,796 individuals reveal 18 new loci associated with body mass index. *Nat Genet* 2010; **42**: 937–48.
- 33 Voight BF, Scott LJ, Steinthorsdottir V, *et al.* Twelve type 2 diabetes susceptibility loci identified through large-scale association analysis. *Nat Genet* 2010; **42**: 579–89.
- 34 Steinthorsdottir V, Thorleifsson G, Reynisdottir I, *et al.* A variant in CDKAL1 influences insulin response and risk of type 2 diabetes. *Nat Genet* 2007; **39**: 770–5.
- 35 Thorleifsson G, Walters GB, Gudbjartsson DF, *et al.* Genome-wide association yields new sequence variants at seven loci that associate with measures of obesity. *Nat Genet* 2009; **41**: 18–24.
- 36 Sladek R, Rocheleau G, Rung J, *et al.* A genome-wide association study identifies novel risk loci for type 2 diabetes. *Nature* 2007; **445**: 881–5.
- 37 Rudan I, Campbell H, Rudan P. Genetic epidemiological studies of eastern Adriatic Island isolates, Croatia: objective and strategies. *Coll Antropol* 1999; **23**: 531–46.
- 38 Aulchenko YS, Heutink P, Mackay I, *et al.* Linkage disequilibrium in young genetically isolated Dutch population. *Eur J Hum Genet* 2004; **12**: 527–34.

- 39 Pattaro C, Marroni F, Riegler A, *et al.* The genetic study of three population microisolates in South Tyrol (MICROS): study design and epidemiological perspectives. *BMC Med Genet* 2007; **8**: 29.
- 40 Hicks AA, Pramstaller PP, Johansson A, *et al.* Genetic determinants of circulating sphingolipid concentrations in European populations. *PLoS Genet* 2009; **5**: e1000672.
- 41 Wichmann H-E, Gieger C, Illig T. KORA-gen--resource for population genetics, controls and a broad spectrum of disease phenotypes. *Gesundheitswesen* 2005; **67 Suppl 1**: S26–30.
- 42 Herder C, Illig T, Baumert J, *et al.* RANTES/CCL5 gene polymorphisms, serum concentrations, and incident type 2 diabetes: results from the MONICA/KORA Augsburg case-cohort study, 1984–2002. *Eur J Endocrinol* 2008; **158**: R1–5.
- 43 Huth C, Heid IM, Vollmert C, *et al.* IL6 gene promoter polymorphisms and type 2 diabetes: joint analysis of individual participants' data from 21 studies. *Diabetes* 2006; **55**: 2915–21.
- 44 Hofman A, Breteler MMB, van Duijn CM, *et al.* The Rotterdam Study: objectives and design update. *Eur J Epidemiol* 2007; **22**: 819–29.
- 45 Wellcome Trust Case Control Consortium. Genome-wide association study of 14,000 cases of seven common diseases and 3,000 shared controls. *Nature* 2007; **447**: 661–78.
- 46 Friedewald WT, Levy RI, Fredrickson DS. Estimation of the concentration of low-density lipoprotein cholesterol in plasma, without use of the preparative ultracentrifuge. *Clin Chem* 1972; **18**: 499–502.
- 47 Keating BJ, Tischfield S, Murray SS, *et al.* Concept, design and implementation of a cardiovascular gene-centric 50 k SNP array for large-scale genomic association studies. *PLoS ONE* 2008; **3**: e3583.
- 48 Purcell S, Neale B, Todd-Brown K, *et al.* PLINK: a tool set for whole-genome association and population-based linkage analyses. *Am J Hum Genet* 2007; **81**: 559–75.
- 49 Kathiresan S, Melander O, Guiducci C, *et al.* Six new loci associated with blood low-density lipoprotein cholesterol, high-density lipoprotein cholesterol or triglycerides in humans. *Nat Genet* 2008; **40**: 189–97.
- 50 Teslovich TM, Musunuru K, Smith AV, *et al.* Biological, clinical and population relevance of 95 loci for blood lipids. *Nature* 2010; **466**: 707–13.
- 51 Schadt EE, Woo S, Hao K. Bayesian method to predict individual SNP genotypes from gene expression data. *Nature Genetics* 2012; **44**: 603–8.

- 52 Sattar N, Preiss D, Murray HM, *et al.* Statins and risk of incident diabetes: a collaborative meta-analysis of randomised statin trials. *The Lancet* 2010; **375**: 735–42.
- 53 Preiss D, Seshasai SRK, Welsh P, *et al.* Risk of incident diabetes with intensive-dose compared with moderate-dose statin therapy: a meta-analysis. *JAMA* 2011; **305**: 2556–64.
- 54 Sacks FM, Pfeffer MA, Moyer LA, *et al.* The effect of pravastatin on coronary events after myocardial infarction in patients with average cholesterol levels. Cholesterol and Recurrent Events Trial investigators. *N Engl J Med* 1996; **335**: 1001–9.
- 55 Amarenco P, Bogousslavsky J, Callahan A 3rd, *et al.* High-dose atorvastatin after stroke or transient ischemic attack. *N Engl J Med* 2006; **355**: 549–59.
- 56 Serruys PWJC, de Feyter P, Macaya C, *et al.* Fluvastatin for prevention of cardiac events following successful first percutaneous coronary intervention: a randomized controlled trial. *JAMA* 2002; **287**: 3215–22.
- 57 Waters DD, Ho JE, DeMicco DA, *et al.* Predictors of new-onset diabetes in patients treated with atorvastatin: results from 3 large randomized clinical trials. *J Am Coll Cardiol* 2011; **57**: 1535–45.
- 58 SSSS Group. Randomised trial of cholesterol lowering in 4444 patients with coronary heart disease: the Scandinavian Simvastatin Survival Study (4S). *Lancet* 1994; **344**: 1383–9.
- 59 Shepherd J, Cobbe SM, Ford I, *et al.* Prevention of coronary heart disease with pravastatin in men with hypercholesterolemia. West of Scotland Coronary Prevention Study Group. *N Engl J Med* 1995; **333**: 1301–7.
- 60 Downs JR, Clearfield M, Weis S, *et al.* Primary prevention of acute coronary events with lovastatin in men and women with average cholesterol levels: results of AFCAPS/TexCAPS. Air Force/Texas Coronary Atherosclerosis Prevention Study. *JAMA* 1998; **279**: 1615–22.
- 61 LIPID Study Group. Prevention of cardiovascular events and death with pravastatin in patients with coronary heart disease and a broad range of initial cholesterol levels. The Long-Term Intervention with Pravastatin in Ischaemic Disease (LIPID) Study Group. *N Engl J Med* 1998; **339**: 1349–57.
- 62 GISSI-Prevenzione Investigators. Results of the low-dose (20 mg) pravastatin GISSI Prevenzione trial in 4271 patients with recent myocardial infarction: do stopped trials contribute to overall knowledge? GISSI Prevenzione Investigators (Gruppo Italiano per lo Studio della Sopravvivenza nell'Infarto Miocardico). *Ital Heart J* 2000; **1**: 810–20.
- 63 Serruys PW, De Feyter PJ, Benghozi R, Hugenholtz PG, Lesaffre E. The Lescol(R) Intervention Prevention Study (LIPS): a double-blind, placebo-controlled, randomized trial of the long-term effects of fluvastatin after

- successful transcatheter therapy in patients with coronary heart disease. *Int J Cardiovasc Intervent* 2001; **4**: 165–72.
- 64 Heart Protection Study Collaborative Group. MRC/BHF Heart Protection Study of cholesterol lowering with simvastatin in 20,536 high-risk individuals: a randomised placebo-controlled trial. *Lancet* 2002; **360**: 7–22.
- 65 Shepherd J, Blauw GJ, Murphy MB, *et al*. Pravastatin in elderly individuals at risk of vascular disease (PROSPER): a randomised controlled trial. *Lancet* 2002; **360**: 1623–30.
- 66 ALLHAT Officers and Coordinators for the ALLHAT Collaborative Research Group. Major outcomes in moderately hypercholesterolemic, hypertensive patients randomized to pravastatin vs usual care: The Antihypertensive and Lipid-Lowering Treatment to Prevent Heart Attack Trial (ALLHAT-LLT). *JAMA* 2002; **288**: 2998–3007.
- 67 Sever PS, Dahlöf B, Poulter NR, *et al*. Prevention of coronary and stroke events with atorvastatin in hypertensive patients who have average or lower-than-average cholesterol concentrations, in the Anglo-Scandinavian Cardiac Outcomes Trial--Lipid Lowering Arm (ASCOT-LLA): a multicentre randomised controlled trial. *Lancet* 2003; **361**: 1149–58.
- 68 Cannon CP, Braunwald E, McCabe CH, *et al*. Intensive versus moderate lipid lowering with statins after acute coronary syndromes. *N Engl J Med* 2004; **350**: 1495–504.
- 69 De Lemos JA, Blazing MA, Wiviott SD, *et al*. Early intensive vs a delayed conservative simvastatin strategy in patients with acute coronary syndromes: phase Z of the A to Z trial. *JAMA* 2004; **292**: 1307–16.
- 70 LaRosa JC, Grundy SM, Waters DD, *et al*. Intensive lipid lowering with atorvastatin in patients with stable coronary disease. *N Engl J Med* 2005; **352**: 1425–35.
- 71 Pedersen TR, Faergeman O, Kastelein JJP, *et al*. High-dose atorvastatin vs usual-dose simvastatin for secondary prevention after myocardial infarction: the IDEAL study: a randomized controlled trial. *JAMA* 2005; **294**: 2437–45.
- 72 Nakamura H, Arakawa K, Itakura H, *et al*. Primary prevention of cardiovascular disease with pravastatin in Japan (MEGA Study): a prospective randomised controlled trial. *Lancet* 2006; **368**: 1155–63.
- 73 Kjekshus J, Apetrei E, Barrios V, *et al*. Rosuvastatin in older patients with systolic heart failure. *N Engl J Med* 2007; **357**: 2248–61.
- 74 Gissi-HF Investigators, Tavazzi L, Maggioni AP, *et al*. Effect of rosuvastatin in patients with chronic heart failure (the GISSI-HF trial): a randomised, double-blind, placebo-controlled trial. *Lancet* 2008; **372**: 1231–9.



- 75 Ridker PM, Danielson E, Fonseca FAH, *et al.* Rosuvastatin to prevent vascular events in men and women with elevated C-reactive protein. *N Engl J Med* 2008; **359**: 2195–207.
- 76 Study of the Effectiveness of Additional Reductions in Cholesterol and Homocysteine (SEARCH) Collaborative Group, Armitage J, Bowman L, *et al.* Intensive lowering of LDL cholesterol with 80 mg versus 20 mg simvastatin daily in 12,064 survivors of myocardial infarction: a double-blind randomised trial. *Lancet* 2010; **376**: 1658–69.

## Acknowledgements

D Swerdlow acknowledges the support of the UCL MBPhD Programme.

The **EPIC-NL** investigators thank GBA, Statistics Netherlands, Dutch Cancer Registry and the Institute PHARMO for providing data on vital status, cause of death and occurrence of cancer and other chronic diseases.

Authors representing the **Fenland Study** thank the Fenland Study Investigators, Study Co-ordination team and the Epidemiology Field, Data and Technical teams as well as the study participants and general practice staff for help with recruitment. Biochemical assays were performed by the National Institute for Health Research, Cambridge Biomedical Research Centre, Core Biochemistry Assay Laboratory, and the Cambridge University Hospitals NHS Foundation Trust, Department of Clinical Biochemistry.

The **Ely Study** investigators are grateful to all those who participated and to the staff of the St Mary's Street surgery, Ely, and all those who worked on the study.

The **HAPIEE** study investigator would like to thank researchers, interviewers and participants in Novosibirsk, Krakow, Kaunas, Havířov/Karviná, Jihlava, Ústí nad Labem, Liberec, Hradec Králové, and Kroměříž without whose help the HAPIEE study would not have been possible.

Authors representing the **IMPROVE Study** express their deep and sincere appreciation to all members of the IMPROVE group for their time and extraordinary commitment. The IMPROVE study group: Dipartimento di Scienze Farmacologiche e Biomolecolari, Università di Milano,, Milan, Italy: C.R. Sirtori, S. Castelnovo; Centro Cardiologico Monzino, IRCCS, Milan Italy: M. Amato, B. Frigerio, A. Ravani, D. Sansaro, C. Tedesco; Atherosclerosis Research Unit, Departments of Medicine and Cardiology, Karolinska University Hospital Solna, & Division of Cardiovascular Epidemiology, Institute of Environmental Medicine, Karolinska Institutet, Stockholm, Sweden: M. Ahl, G. Blomgren, M.J. Eriksson, P. Fahlstadius, M. Heinonen, L. Nilson; University College of London, Department of Medicine, Rayne Institute, London, United Kingdom: J. Cooper, J. Acharya; Foundation for Research in Health Exercise and Nutrition, Kuopio Research Institute of Exercise Medicine, Kuopio, Finland: K. Huttunen, E. Rauramaa, H Pekkarinen, I.M. Penttila, J. Törrönen; Department of Medicine, University Medical Center Groningen, Groningen & Isala Clinics Zwolle, Department of Medicine; the Netherlands: A.I. van Gessel, A.M van Roon, G.C. Teune, W.D. Kuipers, M. Bruin, A. Nicolai, P. Haarsma-Jorritsma, D.J. Mulder, H.J.G. Bilo, G.H. Smeets; Assistance Publique - Hôpitaux de Paris; Service Endocrinologie-Metabolisme, Groupe Hôpitalier Pitié-Salpêtrière, Unités de Prévention Cardiovasculaire, Paris, France: J.L. Beaudeau, J.F. Kahn, V. Carreau, A. Kontush; Institute of Public Health and Clinical Nutrition, University of Eastern Finland, Kuopio Campus: J. Karppi, T. Nurmi, K. Nyyssönen, R. Salonen, T.P. Tuomainen, J.Tuomainen, J. Kauhanen; Internal Medicine, Angiology and Arteriosclerosis Diseases, Department of Clinical and Experimental Medicine, University of Perugia, Perugia, Italy: G. Vaudo, A. Alaeddin, D. Siepi, G. Lupattelli, G. Schillaci.

The authors thank the **WHI** investigators and staff for their dedication, and the study participants for making the program possible. A listing of WHI investigators can be found at [http://www.whiscience.org/publications/WHI\\_investigators\\_shortlist\\_2010-2015.pdf](http://www.whiscience.org/publications/WHI_investigators_shortlist_2010-2015.pdf).

The **CARe Consortium** wishes to acknowledge the support of the National Heart, Lung, and Blood Institute and the contributions of the research institutions, study investigators, field staff and study participants in creating this resource for biomedical research (NHLBI contract number HHSN268200960009C). The following nine parent studies have contributed parent study data, ancillary study data, and DNA samples through the Massachusetts Institute of Technology - Broad Institute (N01-HC-65226) to create this genotype/phenotype database for wide dissemination to the biomedical research community: the Atherosclerosis Risk in Communities (ARIC) study, the Cardiovascular Health Study (CHS), the Cleveland Family Study (CFS), the Cooperative Study of Sickle Cell Disease (CSSCD), the Coronary Artery Risk Development in Young Adults (CARDIA) study, the

Framingham Heart Study (FHS), the Jackson Heart Study (JHS), the Multi-Ethnic Study of Atherosclerosis (MESA), and the Sleep Heart Health Study (SHHS).

The **Caerphilly Prospective study** was undertaken by the former MRC Epidemiology Unit (South Wales) and was funded by the Medical Research Council of the United Kingdom.

Authors representing the **ARIC study** thank the staff and participants of the ARIC study for their important contributions.

The authors representing the **AAA, EAS and ET2DS** studies thank the co-investigators, staff and participants for their invaluable contributions.

## Funding information

The **UCLEB (UCL-LSHTM-Edinburgh-Bristol) Consortium** (including BRHS, BWHHS, CaPS, EAAS, ELSA, ET2DS, NPHS-II and WHII) was supported by a programme grant from the British Heart Foundation (RG/10/12/28456).

The **Utrecht Cardiovascular Pharmacogenetics Study (UCP)** was funded by Veni grant Organization for Scientific Research (NWO), Grant no. 2001.064 Netherlands Heart Foundation (NHS), and TI Pharma Grant T6-101 Mondriaan. The Department of Pharmacoepidemiology and Clinical Pharmacology, Utrecht Institute for Pharmaceutical Sciences, has received unrestricted research funding from the Netherlands Organisation for Health Research and Development (ZonMW), the Dutch Health Care Insurance Board (CVZ), the Royal Dutch Pharmacists Association (KNMP), the private-public funded Top Institute Pharma ( [www.tipharma.nl](http://www.tipharma.nl), includes co-funding from universities, government, and industry), the EU Innovative Medicines Initiative (IMI), EU 7th Framework Program (FP7), the Dutch Medicines Evaluation Board, the Dutch Ministry of Health and industry (including GlaxoSmithKline, Pfizer, and others)."

The **Candidate Gene Association Resource (CARE)** was supported by contract no. HHSN268200625226C and from the National Institutes of Health/NHLBI, and subcontract no. 5215810-5500000041 to C.L.W. A full listing of the grants and contracts that have supported CARE is provided at <http://public.nhlbi.nih.gov/GeneticsGenomics/home/care.aspx>. MESA and the MESA SHARe project are conducted and supported by the National Heart, Lung, and Blood Institute (NHLBI) in collaboration with MESA investigators. Support is provided by grants and contracts N01-HC-95159, N01-HC-95160, N01-HC-95161, N01-HC-95162, N01-HC-95163, N01-HC-95164, N01-HC-95165, N01-HC-95166, N01-HC-95167, N01-HC-95168, N01-HC-95169 and RR-024156.

The **Cardiovascular Health Study (CHS)** was supported by contracts HHSN268201200036C, HHSN268200800007C, N01-HC55222, N01HC85079, N01HC85080, N01HC85081, N01HC85082, N01HC85083, N01HC85086, and grant HL080295 from the National Heart, Lung, and Blood Institute (NHLBI), with additional contribution from the National Institute of Neurological Disorders and Stroke (NINDS). Additional support was provided by AG023629 from the National Institute on Aging (NIA). A full list of principal CHS investigators and institutions can be found at [www.CHS-NHLBI.org](http://www.CHS-NHLBI.org).

The **EPIC-Netherlands (EPIC-NL)** study was funded by 'Europe against Cancer' Programme of the European Commission (SANCO); the Dutch Ministry of Public Health, Welfare and Sports (formerly Ministry of Welfare, Public Health and Culture); the Dutch Cancer Society; ZonMW the Netherlands Organisation for Health Research and Development; and World Cancer Research Fund (WCRF). Genotyping of the IBC-chip was funded by IOP Genomics grant IGE05012 from NL Agency.

The **Fenland Study** is funded by the Wellcome Trust and the MRC.

The **Ely Study** was funded by the MRC, Diabetes UK, and Eastern Region NHS R&D.

The **IMPROVE study** was supported by the European Commission (Contract number: QLG1-CT-2002-00896), the Swedish Heart-Lung Foundation, the Swedish Research Council (projects 8691 and 0593), the Foundation for Strategic Research, the Stockholm County Council (project 562183), the Foundation for Strategic Research, the Academy of Finland (Grant #110413), the Knut and Alice Wallenberg Foundation, the Torsten and Ragnar Söderberg Foundation, the Strategic Cardiovascular Programme of the Karolinska Institutet and the British Heart Foundation (RG2008/014).

The **Prospective Study of Pravastatin in the Elderly at Risk (PROSPER) study** was supported by a European Union Seventh Framework Programme (FP7/2007-2013) under grant agreement n° HEALTH-F2-2009-223004 PHASE, grants from the Interuniversity Cardiology Institute of the Netherlands (ICIN) and the Durrer Center for Cardiogenetic Research both Institutes of the

Netherlands Royal Academy of Arts and Sciences (KNAW) the Netherlands Consortium for Healthy Ageing (NCHA).

The **Women's Health Initiative (WHI)** is funded by the National Heart, Lung and Blood Institute (grant RFP-NHLBI-WH-11-10 - Women's Health Initiative Extension 2010-2015), US Department of Health and Human Services. Clinical trial registration NCT00000611.

Funding for the **AFCAPS/TexCAPS** trial was provided by Merck & Co.

The **ASCOTT-LLA** trial was funded by Pfizer Inc.

**GISSI-PREVENTION** was funded by Bristol-Myers Squibb, Pharmacia-Upjohn, Societa Prodotti, Antibiotici, and Pfizer.

**GISSI-HF** was funded by SPA, Pfizer, Sigma Tau, and AstraZeneca

DNA extraction in the **Caerphilly Prospective Study (CaPS)** study was funded by a grant from the MRC.

The **British Women's Heart and Health Study (BWHHS)** is supported by funding from the British Heart Foundation (BHF) and the Department of Health Policy Research Programme (England). HumanCVD genotyping of the BWHHS was funded by the BHF [PG/07/131/24254].

The **British Regional Heart Study (BRHS)** is a BHF research group and is supported by a BHF programme grant RG/08/013/25942.

The **MRC National Survey of Health and Development (MRC NSHD)** is supported by the MRC (MC\_UU\_12019/1).

The **Prevention of Renal and Vascular Endstage Disease Study (PREVEND)** genetics is supported by the Dutch Kidney Foundation (Grant E033), the EU project grant GENECURE (FP-6 LSHM CT 2006 037697), the National Institutes of Health (grant LM010098), the Netherlands organisation for health research and development (NWO VENI grant 916.761.70), and the Dutch Inter University Cardiology Institute Netherlands (ICIN).

The **Copenhagen City Heart Study (CCHS)** is supported by the Danish MRC (grant no. 10-083788), the Research Fund at Rigshospitalet, Copenhagen University Hospital, Chief Physician Johan Boserup and Lise Boserup's Fund, Ingeborg and Leo Dannin's Grant, Henry Hansen and Wife's grant, and a grant from the Odd Fellow Order.

The **Whitehall II Study (WHII)** is supported by the National Institute on Aging, the MRC (K013351), the British Heart Foundation and the National Heart, Lung and Blood Institute (HL036310).

The **Atherosclerosis Risk in Communities Study (ARIC)** is carried out as a collaborative study supported by National Heart, Lung, and Blood Institute contracts (HHSN268201100005C, HHSN268201100006C, HHSN268201100007C, HHSN268201100008C, HHSN268201100009C, HHSN268201100010C, HHSN268201100011C, and HHSN268201100012C), R01HL087641, R01HL59367 and R01HL086694; National Human Genome Research Institute contract U01HG004402; and National Institutes of Health contract HHSN268200625226C. Infrastructure was partly supported by Grant Number UL1RR025005, a component of the National Institutes of Health and NIH Roadmap for Medical Research.

The **Health, Alcohol and Psychosocial factors In Eastern Europe studies (HAPIEE)** are supported by Wellcome Trust (064947/Z/01/Z and 081081/Z/06/Z); a grant from the National Institute on Aging (1R01 AG23522-01); and a grant from MacArthur Foundation.

The **Edinburgh Artery Study (EAS)** was funded by the British Heart Foundation.

The **Aspirin in Asymptomatic Atherosclerosis Trial (AAA)** was funded by the British Heart Foundation and the Chief Scientist Office, Scotland.

The **Edinburgh Type 2 Diabetes Study (ET2DS)** was funded by the MRC of the United Kingdom (project grant G0500877).

The **Second Manifestations of Arterial Disease study (SMART)** was financially supported by the Biobanking and Biomolecular Research Infrastructure BBMRI-NL, financed by the Dutch government (NWO 184.021.007).

The **Women's Genome Health Study (WGHS)** is supported by HL043851 and HL080467 from the National Heart, Lung, and Blood Institute and CA047988 from the National Cancer Institute, with collaborative scientific support and funding for genotyping provided by Amgen.

**The Justification for the Use of Statins in Prevention: an Intervention Trial Evaluating Rosuvastatin trial (JUPITER)** and genetic analysis in the JUPITER population were funded by AstraZeneca.

The **Coronary Artery Risk Development in Young Adults (CARDIA)** Study is conducted and supported by the National Heart, Lung, and Blood Institute in collaboration with the University of Alabama at Birmingham (HHSN268201300025C & HHSN268201300026C), Northwestern University (HHSN268201300027C), University of Minnesota (HHSN268201300028C), Kaiser Foundation Research Institute (HHSN268201300029C), and Johns Hopkins University School of Medicine (HHSN268200900041C). CARDIA is also partially supported by the Intramural Research Program of the National Institute on Aging. This manuscript has been reviewed and approved by CARDIA for scientific content.

## Supplementary tables and figures

Supplementary Table 1 - SNPs within 55kb of *HMGR* on the Cardiochip platform and their associations with LDL-C in the Whitehall II study

| Selected for analysis | SNP        | Chr. | Base pair position | No. of participants | LDL-C $\beta$ -coefficient | Association with LDL-C  |                          |         | LDL-C R <sup>2</sup> | F-statistic | MAF |
|-----------------------|------------|------|--------------------|---------------------|----------------------------|-------------------------|--------------------------|---------|----------------------|-------------|-----|
|                       |            |      |                    |                     |                            | 95% Confidence interval | Regression model p-value |         |                      |             |     |
| ✓                     | rs12916    | 5    | 74692295           | 4,666               | 0.12                       | 0.08 to 0.17            | 6.0e-09                  | 7.2e-03 | 33.96                | 0.40        |     |
|                       | rs10038095 | 5    | 74673467           | 4,667               | 0.12                       | 0.07 to 0.16            | 5.8e-08                  | 6.3e-03 | 29.51                | 0.38        |     |
|                       | rs12654264 | 5    | 74684359           | 4,665               | 0.12                       | 0.07 to 0.16            | 8.3e-08                  | 6.1e-03 | 28.83                | 0.38        |     |
|                       | rs3846662  | 5    | 74686840           | 4,661               | 0.11                       | 0.07 to 0.15            | 9.8e-08                  | 6.1e-03 | 28.51                | 0.43        |     |
| ✓                     | rs17238484 | 5    | 74684252           | 4,658               | 0.12                       | 0.07 to 0.17            | 1.0e-06                  | 5.1e-03 | 23.96                | 0.23        |     |
|                       | rs10474434 | 5    | 74680437           | 4,671               | 0.12                       | 0.07 to 0.17            | 1.5e-06                  | 4.9e-03 | 23.17                | 0.23        |     |
|                       | rs3804231  | 5    | 74732535           | 4,672               | 0.14                       | 0.07 to 0.20            | 1.5e-05                  | 4.0e-03 | 18.75                | 0.13        |     |
|                       | rs2303152  | 5    | 74677463           | 4,677               | 0.07                       | 0.00 to 0.14            | .038                     | 9.2e-04 | 4.31                 | 0.10        |     |
|                       | rs17238540 | 5    | 74691254           | 4,673               | -0.12                      | -0.25 to 0.02           | .098                     | 5.9e-04 | 2.74                 | 0.02        |     |
|                       | rs3761739  | 5    | 74667257           | 4,672               | 0.04                       | -0.02 to 0.10           | .152                     | 4.4e-04 | 2.05                 | 0.15        |     |
|                       | rs3761740  | 5    | 74667889           | 4,676               | 0.04                       | -0.03 to 0.11           | .229                     | 3.1e-04 | 1.45                 | 0.09        |     |
|                       | rs17238372 | 5    | 74672629           | 4,677               | 0.13                       | -0.08 to 0.34           | .231                     | 3.1e-04 | 1.44                 | 0.01        |     |
|                       | rs17648288 | 5    | 74732394           | 4,674               | 0.04                       | -0.03 to 0.11           | .258                     | 2.7e-04 | 1.28                 | 0.09        |     |
|                       | rs16872536 | 5    | 74714241           | 4,673               | 0.04                       | -0.03 to 0.11           | .274                     | 2.6e-04 | 1.20                 | 0.08        |     |
|                       | rs10474435 | 5    | 74693036           | 4,674               | 0.10                       | -0.09 to 0.29           | .285                     | 2.5e-04 | 1.15                 | 0.01        |     |
|                       | rs16872526 | 5    | 74711473           | 4,664               | 0.04                       | -0.03 to 0.11           | .29                      | 2.4e-04 | 1.12                 | 0.08        |     |
|                       | rs10038689 | 5    | 74718367           | 4,677               | 0.10                       | -0.09 to 0.29           | .302                     | 2.3e-04 | 1.07                 | 0.01        |     |
|                       | rs17244848 | 5    | 74679426           | 4,632               | 0.03                       | -0.04 to 0.11           | .336                     | 2.0e-04 | 0.92                 | 0.09        |     |
|                       | rs17244939 | 5    | 74666852           | 4,671               | -0.07                      | -0.22 to 0.08           | .369                     | 1.7e-04 | 0.81                 | 0.02        |     |
|                       | rs4704209  | 5    | 74670229           | 4,670               | 0.04                       | -0.05 to 0.13           | .42                      | 1.4e-04 | 0.65                 | 0.06        |     |
|                       | rs3889900  | 5    | 74741803           | 4,678               | -                          | -                       | -                        | -       | -                    | <0.01       |     |
|                       | rs17238477 | 5    | 74680879           | 4,678               | -                          | -                       | -                        | -       | -                    | <0.01       |     |
|                       | rs17244715 | 5    | 74667984           | 4,678               | -                          | -                       | -                        | -       | -                    | <0.01       |     |
|                       | rs17238519 | 5    | 74689134           | 4,671               | -                          | -                       | -                        | -       | -                    | <0.01       |     |
|                       | rs17244946 | 5    | 74667566           | 4,676               | -                          | -                       | -                        | -       | -                    | <0.01       |     |
|                       | rs17238435 | 5    | 74677582           | 4,678               | -                          | -                       | -                        | -       | -                    | <0.01       |     |
|                       | rs17244708 | 5    | 74667603           | 4,675               | -                          | -                       | -                        | -       | -                    | <0.01       |     |
|                       | rs17244890 | 5    | 74688485           | 4,671               | -                          | -                       | -                        | -       | -                    | <0.01       |     |
|                       | rs17238337 | 5    | 74667055           | 4,675               | -                          | -                       | -                        | -       | -                    | <0.01       |     |
|                       | rs16872532 | 5    | 74713739           | 4,678               | -                          | -                       | -                        | -       | -                    | <0.01       |     |
|                       | rs17244722 | 5    | 74668837           | 4,676               | -                          | -                       | -                        | -       | -                    | <0.01       |     |
|                       | rs17244960 | 5    | 74680009           | 4,676               | -                          | -                       | -                        | -       | -                    | <0.01       |     |
|                       | rs17244883 | 5    | 74688082           | 4,676               | -                          | -                       | -                        | -       | -                    | <0.01       |     |
|                       | rs17238449 | 5    | 74678164           | 4,678               | -                          | -                       | -                        | -       | -                    | <0.01       |     |
|                       | rs17244757 | 5    | 74672460           | 4,676               | -                          | -                       | -                        | -       | -                    | <0.01       |     |



| Selected for analysis | SNP        | Chr. | Base pair position | No. of participants | LDL-C $\beta$ -coefficient | Association with LDL-C  |                          |             |             |       |
|-----------------------|------------|------|--------------------|---------------------|----------------------------|-------------------------|--------------------------|-------------|-------------|-------|
|                       |            |      |                    |                     |                            | 95% Confidence interval | Regression model p-value | LDL-C $R^2$ | F-statistic | MAF   |
|                       | rs17244729 | 5    | 74669229           | 4,676               | -                          | -                       | -                        | -           | -           | <0.01 |
|                       | rs17238554 | 5    | 74693408           | 4,674               | -                          | -                       | -                        | -           | -           | <0.01 |
|                       | rs17238575 | 5    | 74680466           | 4,671               | -                          | -                       | -                        | -           | -           | <0.01 |

SNPs are ranked on p-value and  $\beta$ -coefficient;  $\beta$ -coefficients are reported on the log scale. For SNPs where  $\beta$ -coefficient is absent, no variation in genotype was observed in the Whitehall II study sample owing to very low minor allele frequency and consequently a regression model could not be fitted.

Abbreviations: Chr – chromosome;  $R^2$  – proportion of variance explained; MAF – minor allele frequency

Supplementary Table 2 – Genotype information for studies contributing individual participant-level data

| Study              | Genotyping platform                    | rs17238484        |                                       |        |       |     |         |                |       |                   | rs12916                               |       |       |       |         |                |                       |
|--------------------|----------------------------------------|-------------------|---------------------------------------|--------|-------|-----|---------|----------------|-------|-------------------|---------------------------------------|-------|-------|-------|---------|----------------|-----------------------|
|                    |                                        | SNP call rate (%) | Proxy SNP used (LD, r <sup>2</sup> )* | GG     | GT    | TT  | MAF (%) | χ <sup>2</sup> | HWE p | SNP call rate (%) | Proxy SNP used (LD, r <sup>2</sup> )* | TT    | TC    | CC    | MAF (%) | χ <sup>2</sup> | HWE p                 |
| AAA                | KASPAR                                 |                   | -                                     | 1,358  | 792   | 100 | 22.0    | 1.31           | 0.25  | 95.9              | -                                     | 999   | 943   | 321   | 35.0    | 16.12          | 6.0x10 <sup>-5</sup>  |
| ARIC               | IBC Cardiochip                         |                   | -                                     | 5,635  | 3,386 | 565 | 23.6    | 3.53           | 0.06  | 100.0             | -                                     | 3,432 | 4,528 | 1,628 | 40.6    | 4.16           | 0.04                  |
| BRHS               | KASPar                                 | 98.3              | -                                     | 2,328  | 1,325 | 223 | 27.4    | 3.56           | 0.06  | 97.3              | -                                     | 1,620 | 1,562 | 657   | 37.5    | 66.5           | 3.5x10 <sup>-16</sup> |
| BWHHS              | IBC Cardiochip                         |                   | -                                     | 2,010  | 1,245 | 185 | 23.5    | 0.19           | 0.67  | 99.9              | -                                     | 1,218 | 1,668 | 557   | 40.4    | 0.12           | 0.72                  |
| CaPS               | KASPar                                 |                   | -                                     | 837    | 498   | 70  | 22.7    | 0.14           | 0.71  | 98.5              | -                                     | 563   | 627   | 216   | 37.7    | 3.55           | 0.06                  |
| CARDIA             | IBC Cardiochip                         |                   | -                                     | 836    | 527   | 80  | 23.8    | 0.07           | 0.80  | 100.0             | -                                     | 472   | 736   | 235   | 41.8    | 3.38           | 0.07                  |
| CCHS               | ABI TaqMan                             | 90.5              | -                                     | 5,532  | 3,385 | 488 | 23.2    | 1.03           | 0.31  | -                 | -                                     | -     | -     | -     | -       | -              | -                     |
| CFS                | IBC Cardiochip                         |                   | -                                     | 79     | 48    | 8   | 23.7    | 0.04           | 0.84  | 100.0             | -                                     | 45    | 58    | 32    | 45.2    | 2.38           | 0.12                  |
| CHS                | IBC Cardiochip                         |                   | -                                     | 2,344  | 1,381 | 225 | 23.2    | 1.31           | 0.25  | 100.0             | -                                     | 1,413 | 1,911 | 628   | 40.1    | 0.18           | 0.67                  |
| EAS                | ABI TaqMan                             |                   | -                                     | 518    | 287   | 46  | 22.3    | 0.57           | 0.45  | 93.9              | -                                     | 323   | 402   | 131   | 38.8    | 0.10           | 0.75                  |
| ELSA               | KASPar                                 |                   | -                                     | 3,352  | 1,852 | 277 | 22.0    | 1.04           | 0.31  | -                 | -                                     | -     | -     | -     | -       | -              | -                     |
| Ely                | MetaboChip                             |                   | rs3761742 (1.00)                      | 989    | 544   | 68  | 21.2    | 0.39           | 0.53  | -                 | -                                     | -     | -     | -     | -       | -              | -                     |
| EPIC-NL            | IBC Cardiochip                         |                   | -                                     | 3,009  | 1,837 | 251 | 22.6    | 1.02           | 0.31  | -                 | -                                     | -     | -     | -     | -       | -              | -                     |
| ET2DS <sup>1</sup> | KASPar                                 |                   | -                                     | 690    | 311   | 52  | 19.71   | 4.68           | 0.03  | 97.8              | -                                     | 501   | 390   | 155   | 33.5    | 27.7           | 0.14                  |
| MRC Fenland        | MetaboChip                             |                   | rs3761742 (1.00)                      | 1,953  | 1,061 | 172 | 22.1    | 3.11           | 0.08  | -                 | -                                     | -     | -     | -     | -       | -              | -                     |
| FHS                | IBC Cardiochip                         |                   | -                                     | 807    | 456   | 69  | 22.3    | 0.19           | 0.66  | 100.0             | -                                     | 491   | 647   | 198   | 39.0    | 0.41           | 0.52                  |
| HAPIEE-CZ          | KASPar                                 |                   | -                                     | 3,996  | 2,384 | 341 | 22.8    | 0.26           | 0.55  | -                 | -                                     | -     | -     | -     | -       | -              | -                     |
| HAPIEE-LT          | KASPar                                 |                   | -                                     | 4,049  | 2,424 | 407 | 23.5    | 3.04           | 0.08  | -                 | -                                     | -     | -     | -     | -       | -              | -                     |
| HAPIEE-PL          | KASPar                                 |                   | -                                     | 3,456  | 1,988 | 282 | 22.3    | 0.03           | 0.86  | -                 | -                                     | -     | -     | -     | -       | -              | -                     |
| HAPIEE-RU          | KASPar                                 |                   | -                                     | 4,264  | 2,423 | 377 | 22.5    | 1.82           | 0.18  | -                 | -                                     | -     | -     | -     | -       | -              | -                     |
| IMPROVE            | MetaboChip                             |                   | -                                     | 1,937  | 1,310 | 215 | 25.1    | 0.11           | 0.74  | 100.0             | -                                     | 1,081 | 1,748 | 636   | 43.6    | 2.32           | 0.13                  |
| InterAct           | Illumina 660W/<br>Sequenom/ ABI TaqMan | 100.0             | rs3761742 (1.00)                      | 11,843 | 6,209 | 838 | 20.9    | 0.45           | 0.50  | 100.0             | -                                     | 3,122 | 9,138 | 6,634 | 40.7    | 0.07           | 0.79                  |
| JUPITER            | Illumina Omni 1M Quad                  | 100.0             | -                                     | 5,363  | 2,983 | 403 | 21.7    | 0.21           | 0.65  | 100.0             | -                                     | 3,249 | 4,157 | 1,340 | 39.1    | 0.03           | 0.86                  |
| MESA               | IBC Cardiochip                         | 100.0             | -                                     | 1,333  | 829   | 135 | 23.9    | 0.17           | 0.68  | 100.0             | -                                     | 792   | 1,138 | 368   | 40.77   | 1.47           | 0.22                  |
| MRC NSHD           | KASPar                                 | 95.8              | -                                     | 1,432  | 830   | 140 | 23.1    | 1.82           | 0.18  | 100.0             | -                                     | 1,048 | 967   | 387   | 36.2    | 39.9           | 2.7x10 <sup>-10</sup> |
| NPHS-II            | ABI TaqMan                             |                   | -                                     | 1,646  | 923   | 131 | 21.9    | 0.01           | 0.91  | 100.0             | -                                     | 960   | 1,286 | 456   | 41.1    | 0.10           | 0.75                  |
| PROSPER            | Illumina 660K                          | >97.5             | rs3761742 (1.00)                      | 3,307  | 1,710 | 227 | 20.6    | 0.10           | 0.75  | -                 | -                                     | -     | -     | -     | -       | -              | -                     |
| SMART              | KASPar                                 | 99.4              | -                                     | 4,915  | 3,007 | 449 | 23.3    | 0.15           | 0.70  | -                 | -                                     | -     | -     | -     | -       | -              | -                     |

|                     |                       |       |                  |        |       |       |       |                       |       |       |       |       |        |       |      |      |      |
|---------------------|-----------------------|-------|------------------|--------|-------|-------|-------|-----------------------|-------|-------|-------|-------|--------|-------|------|------|------|
| <b>TPT</b>          | ABI TaqMan            | -     | 2,349            | 1,403  | 197   | 22.8  | 0.45  | 0.50                  | -     | -     | -     | -     | -      | -     | -    | -    |      |
| <b>UCP</b>          | IBC Cardiochip        | -     | 973              | 556    | 102   | 23.3  | 3.48  | 0.06                  | -     | -     | -     | -     | -      | -     | -    | -    |      |
| <b>WGHS</b>         | Illumin HumanHap Duo+ | 100.0 | rs1051795 (0.95) | 14,559 | 7,708 | 1,020 | 20.9  | $2.84 \times 10^{-5}$ | 0.99  | 99.99 | -     | 8,260 | 11,213 | 3,818 | 40.5 | 0.02 | 0.90 |
| <b>WHI</b>          | IBC Cardiochip        | -     | 3,442            | 1,779  | 316   | 21.8  | 17.85 | $2 \times 10^{-5}$    | 100.0 | -     | 2,042 | 2,692 | 981    | 40.7  | 3.37 | 0.07 |      |
| <b>Whitehall II</b> | IBC Cardiochip        | -     | 3,020            | 1,765  | 252   | 22.5  | 0.08  | 0.78                  | 99.8  | -     | 1,794 | 2,421 | 832    | 40.5  | 0.10 | 0.75 |      |

Abbreviations: HWE - Hardy-Weinberg equilibrium; MAF - minor allele frequency; LD – linkage disequilibrium

\*Linkage disequilibrium data derived from 1000 Genomes Pilot 1

<sup>1</sup> Minor allele frequency in diabetes cases

Supplementary Table 3 - Collaborating genetic study characteristics

| Study name            | Study design | Geographical location   | Sampling frame     | Participants included | Baseline year(s) | % Male | Age (Mean ,SD) | Fasting blood samples? |
|-----------------------|--------------|-------------------------|--------------------|-----------------------|------------------|--------|----------------|------------------------|
| AAA                   | RCT          | UK                      | General practice   | 2,250                 | 1998-2001        | 28.5   | 61.9 (6.6)     | No                     |
| ARIC                  | Cohort       | USA                     | Community          | 9,586                 | 1986             | 53.5   | 54.3 (5.7)     |                        |
| BRHS                  | Cohort       | UK                      | General practice   | 3,876                 | 1978-1980        | 100    | 68.7 (5.5)     |                        |
| BWHHS                 | Cohort       | UK                      | General practice   | 3,440                 | 1999-2001        | 0      | 69.3 (5.5)     |                        |
| CaPS                  | Cohort       | UK                      | Community          | 1,405                 | 1984-1988        | 100    | 56.7 (4.4)     |                        |
| CARDIA                | Cohort       | USA                     | Community          | 1,443                 | 1985-1986        | 53.4   | 25.6 (3.4)     |                        |
| CCHS                  | Cohort       | Denmark                 | Population         | 9,405                 | 1990-2003        | 44.2   | 56.7 (16)      | No                     |
| CFS                   | Cohort       | USA                     | Community (family) | 135                   | 1995             | 41.5   | 53.9 (14.7)    |                        |
| CHS                   | Cohort       | USA                     | Community          | 3,950                 | 1989             | 45.0   | 70.4 (5.3)     | Yes                    |
| deCODE                | Cohort       | Iceland                 | Population, clinic | 24,650                | -                | -      | -              | -                      |
| DGDG                  | C-C          | France                  | Clinic, population | 1,376                 | -                | -      | -              | -                      |
| DGI                   | C-C          | Finland, Sweden         | Population         | 2,097                 | -                | 47.7   | -              | -                      |
| EAS                   | Cohort       | UK                      | General practices  | 851                   | 1987             | 50.8   | 64.3 (5.6)     | Yes                    |
| ELSA                  | Cohort       | UK                      | HSE respondents    | 5,481                 | 1998, 1999, 2001 | 45.6   | 61.0 (9.6)     |                        |
| Ely                   | Cohort       | UK                      | General practice   | 1,601                 | 1990-1992        | 47.0   | 61.1 (9.2)     |                        |
| EPIC-NL               | Nested C-Ct  | Netherlands             | Population         | 5,194                 | 1993-1997        | 21.9   | 54.1 (10.1)    | No                     |
| ET2DS                 | Cohort       | UK                      | Community (cases)  | 1,053                 | 2006-2007        | 50.3   | 67.9 (4.2)     | Yes                    |
| EUROSPAN              | C-C          | Europe                  | Population         | 3,978                 | -                | -      | -              | -                      |
| MRC Fenland           | Cohort       | UK                      | General practices  | 3,186                 | 2004 (ongoing)   | 46.0   | 46.9 (7.1)     |                        |
| FHS                   | Cohort       | USA                     | Community          | 1,332                 | 1948/1971/2002   | 52.7   | 45.7 (10.1)    |                        |
| FUSION                | C-C          | Finland                 | Community          | 2,335                 | -                | -      | -              | -                      |
| HAPIEE-Czech Republic | Cohort       | Czech Republic          | Population         | 6,721                 | 2002-2005        | 46.6   | 58.3 (7.1)     |                        |
| HAPIEE-Lithuania      | Cohort       | Lithuania               | Population         | 6,880                 | 2006-2008        | 45.4   | 61.0 (7.6)     |                        |
| HAPIEE-Poland         | Cohort       | Poland                  | Population         | 5,726                 | 2002-2005        | 45.4   | 57.6 (6.9)     |                        |
| HAPIEE-Russia         | Cohort       | Russia                  | Population         | 7,064                 | 2002-2005        | 45.6   | 58.9 (7.1)     |                        |
| IMPROVE               | Cohort       | Europe                  | Clinic             | 3,462                 | 2004             | 48.3   | 64.2 (5.4)     | Yes                    |
| InterAct              | Cohort       | Europe                  | Population         | 18,894                | 1991             | 49.7   | 55.6           |                        |
| JUPITER               | RCT          | America, Europe, Africa | Clinic             | 8,749                 | 2003-2005        | 67.8   | 66.1           | Yes                    |
| KORAgen               | Nested C-C   | Germany                 | Population         | 1,871                 | -                | -      | -              | -                      |
| MESA                  | Cohort       | USA                     | Population         | 2,297                 | 2000-2002        | 47.8   | 62.7 (10.2)    | Yes                    |
| MRC NSHD              | Birth cohort | UK                      | Birth register     | 2,402                 | 1946             | 49.8   | 53.0 (0.0)     | No                     |
| NPHS-II               | Cohort       | UK                      | General practices  | 2,700                 | 1989-1994        | 100    | 56.6 (3.4)     |                        |

|                     |             |               |                  |        |           |      |             |     |  |
|---------------------|-------------|---------------|------------------|--------|-----------|------|-------------|-----|--|
| <b>PREVEND</b>      | Prospective | Netherlands   | Population       | 3,649  | 1997      | 51   |             |     |  |
| <b>PROSPER</b>      | RCT         | Europe        | Clinic           | 5,804  | 1997-1999 | 48.3 | 75.3 (3.3)  | Yes |  |
| <b>Rotterdam</b>    | Nested C-C  | Netherlands   | Population       | 5,939  | -         | -    | -           | -   |  |
| <b>SMART</b>        | Cohort      | Netherlands   | Clinic           | 8,371  | 1996-2011 | 65.1 | 56.5 (12.4) | Yes |  |
| <b>TPT</b>          | RCT         | UK            | General practice | 3,949  | 1984-1989 | 100  | 57.4 (6.7)  |     |  |
| <b>UCP</b>          | Nested C-C  | Netherlands   | Clinic           | 1,631  | 2007      | 74.5 | 62.8 (9.6)  |     |  |
| <b>WGHS</b>         | RCT         | North America | Professional     | 23,294 | 1992-1994 | 0    | 54.7        | Yes |  |
| <b>WHI</b>          | Nested C-C  | USA           | Community        | 5,537  | 1994-1998 | 0    | 68.1 (6.6)  | Yes |  |
| <b>Whitehall II</b> | Cohort      | UK            | Workplace        | 5,037  | 1985-1988 | 73.6 | 49.2 (6.0)  |     |  |
| <b>WTCCC</b>        | C-C         | UK            | Population       | 4,862  | -         | -    | -           | -   |  |

Abbreviations: C-C : case-control; C-Ct: case-cohort; HSE - Health Survey for England

- : Data unavailable

Supplementary Table 4 - Data availability for biomarkers and events in studies contributing to the primary genetic analysis

|             | Biomarkers  |       |           |        |       |             |           |                 |                |                | Clinical events<br>(prevalent & incident) |       |
|-------------|-------------|-------|-----------|--------|-------|-------------|-----------|-----------------|----------------|----------------|-------------------------------------------|-------|
|             | Total chol. | LDL-C | Non-HDL-C | Weight | BMI   | Waist circ. | Hip circ. | Waist:hip ratio | Plasma glucose | Plasma insulin | Diabetes mellitus                         |       |
| AAA         | 2,242       | -     | -         | -      | -     | -           | -         | -               | -              | -              | -                                         | 48    |
| ARIC        | 9,567       | 9,412 | 9,567     | 9,578  | 9,578 | 9,576       | 9,576     | 9,575           | 7,740          | 9,578          | -                                         | 1,184 |
| BRHS        | 3,855       | 3,746 | 3,740     | 3,867  | 3,873 | 3,850       | 3,859     | 3,848           | 3,856          | -              | -                                         | 294   |
| BWHHS       | 3,257       | 3,177 | 3,253     | 3,249  | 3,243 | 3,233       | 3,236     | 3,239           | 3,252          | 3,274          | -                                         | 439   |
| CaPS        | 1,338       | 1,299 | -         | 1,376  | 1,360 | 1,354       | 1,353     | 1,352           | 1,339          | 696            | -                                         | 117   |
| CARDIA      | 1,436       | 1,436 | 1,436     | 1,438  | 1,437 | 1,436       | 1,437     | 1,436           | 1,331          | 1,321          | -                                         | 99    |
| CCHS        | 9,394       | 9,379 | 9,388     | 9,385  | 9,382 | 9,364       | 9,365     | 9,365           | -              | -              | -                                         | 843   |
| CFS         | 39          | 38    | 39        | 134    | 134   | 45          | 45        | 45              | 39             | 39             | -                                         | 17    |
| CHS         | 3,941       | -     | 3,936     | -      | 3,938 | -           | -         | -               | 3,936          | -              | -                                         | -     |
| deCODE      | -           | -     | -         | -      | -     | -           | -         | -               | -              | -              | -                                         | 1,456 |
| DGDG        | -           | -     | -         | -      | -     | -           | -         | -               | -              | -              | -                                         | 679   |
| DGI         | -           | -     | -         | -      | -     | -           | -         | -               | -              | -              | -                                         | 1,022 |
| EAS         | 850         | 846   | 846       | 851    | 851   | -           | -         | -               | 849            | -              | -                                         | 30    |
| ELSA        | 5,449       | 5,304 | 5,447     | 5,323  | 5,235 | 5,362       | 5,351     | 5,346           | -              | -              | -                                         | -     |
| Ely         | 1,600       | 1,597 | -         | 1,599  | 1,598 | 1,588       | 1,587     | 1,586           | 1,598          | 1,596          | -                                         | 89    |
| EPIC-NL     | 4,337       | 4,261 | 3,060     | 5,186  | 5,185 | 5,181       | 5,181     | 5,179           | 3,455          | -              | -                                         | 1,110 |
| ET2DS       | 1,025       | -     | 1,025     | 1,032  | 1,032 | 1,028       | 1,028     | 1,028           | 1,021          | -              | -                                         | 1,053 |
| EUROSPAN    | -           | -     | -         | -      | -     | -           | -         | -               | -              | -              | -                                         | 268   |
| MRC Fenland | 3,180       | 3,155 | -         | 3,184  | 3,184 | 3,183       | 3,183     | 3,182           | 3,178          | 3,148          | -                                         | 38    |
| FHS         | 845         | 844   | 844       | 858    | 316   | 785         | 784       | 783             | 825            | 749            | -                                         | 161   |
| FUSION      | -           | -     | -         | -      | -     | -           | -         | -               | -              | -              | -                                         | 1,161 |
| HAPIEE-CZ   | 6,568       | 6,301 | 6,543     | 6,719  | 6,716 | -           | -         | 6,708           | 914            | -              | -                                         | 355   |
| HAPIEE-LT   | 6,838       | 6,655 | 6,720     | 6,874  | 6,874 | -           | -         | 6,873           | 6,708          | -              | -                                         | 389   |
| HAPIEE-PL   | 5,720       | 5,647 | 5,720     | 5,720  | 5,716 | -           | -         | 5,719           | 5,713          | -              | -                                         | 423   |
| HAPIEE-RU   | 7,062       | 7,058 | 7,060     | 7,064  | 7,063 | -           | -         | 7,061           | 1,042          | -              | -                                         | 254   |
| IMPROVE     | 3,456       | 3,395 | -         | 3,461  | 3,461 | 3,462       | 3,462     | 3,462           | 3,455          | -              | -                                         | 858   |
| InterAct    | -           | -     | -         | -      | -     | -           | -         | -               | -              | -              | -                                         | 8,247 |
| JUPITER     | -           | -     | -         | 8,729  | 8,723 | -           | -         | -               | -              | -              | -                                         | 279   |
| KORAgem     | -           | -     | -         | -      | -     | -           | -         | -               | -              | -              | -                                         | 433   |
| MESA        | 2,292       | 2,260 | 2,290     | 2,297  | 2,297 | 2,297       | 2,297     | 2,297           | 2,292          | -              | -                                         | 220   |

|                     |         |         |        |         |         |        |        |        |        |        |        |
|---------------------|---------|---------|--------|---------|---------|--------|--------|--------|--------|--------|--------|
| <b>MRC NSHD</b>     | 2,236   | 2,072   | 2,082  | 2,382   | 2,379   | 2,961  | 2,388  | 2,957  | -      | -      | -      |
| <b>NPHS-II</b>      | 2,680   | 1,703   | 1,789  | 2,698   | 2,697   | -      | -      | -      | -      | -      | 221    |
| <b>PREVEND</b>      | 3,626   | 3,496   | 3,554  | 3,623   | 3,622   | 3,622  | 3,622  | 3,622  | 3,465  | 3,402  | 140    |
| <b>PROSPER</b>      | 5,244   | 5,242   | -      | 5,243   | 5,242   | -      | -      | -      | 5,060  | 5,032  | 269    |
| <b>Rotterdam</b>    | -       | -       | -      | -       | -       | -      | -      | -      | -      | -      | 1,178  |
| <b>SMART</b>        | 7,897   | 7,448   | 7,879  | 7,925   | 7,924   | 6,715  | 6,713  | 6,716  | 7,879  | 4,373  | -      |
| <b>TPT</b>          | 3,912   | -       | -      | 3,932   | 3,932   | -      | -      | -      | -      | -      | -      |
| <b>UCP</b>          | -       | -       | -      | 1,592   | 1,487   | -      | -      | -      | -      | -      | -      |
| <b>WGHS</b>         | -       | -       | -      | 23,043  | 23,291  | -      | -      | -      | -      | -      | 1,444  |
| <b>WHI</b>          | 2,920   | 1,472   | 2,861  | -       | 5,489   | -      | -      | -      | -      | -      | 272    |
| <b>Whitehall II</b> | 4,739   | 4,658   | 4,724  | 4,752   | 4,746   | 4,693  | 4,692  | 4,688  | 4,543  | 4,245  | 334    |
| <b>WTCCC</b>        | -       | -       | -      | -       | -       | -      | -      | -      | -      | -      | 1,924  |
| <b>Total</b>        | 117,545 | 101,901 | 84,415 | 143,114 | 152,005 | 69,735 | 69,159 | 96,067 | 73,490 | 37,453 | 27,348 |

*Abbreviations:* TC - total cholesterol; HDL-C - high density lipoprotein cholesterol; LDL-C - low density lipoprotein cholesterol

Supplementary Table 5 - Clinical outcome definitions

|              | Diabetes (all aetiology, prevalent & incident) |                 |                        |
|--------------|------------------------------------------------|-----------------|------------------------|
|              | Self report                                    | Medical records | Clinical/lab. measures |
| AAA          | •                                              | •               |                        |
| ARIC         |                                                | •               | •                      |
| BRHS         |                                                | •               |                        |
| BWHHS        | •                                              | •               |                        |
| CaPS         | •                                              | •               | •                      |
| CARDIA       | •                                              | •               | •                      |
| CCHS         |                                                | •               |                        |
| CFS          |                                                | •               |                        |
| CHS          |                                                | •               | •                      |
| deCODE       | -                                              | -               | -                      |
| EAS          | •                                              |                 |                        |
| ELSA         | n/a                                            | n/a             | n/a                    |
| Ely          | n/a                                            | n/a             | n/a                    |
| EPIC-NL      | •                                              | •               |                        |
| ET2DS        |                                                | •               | •                      |
| EUROSPAN     | -                                              | -               | -                      |
| MRC Fenland  | n/a                                            | n/a             | n/a                    |
| FHS          |                                                | •               |                        |
| FUSION       | -                                              | -               | -                      |
| HAPIEE-CZ    | •                                              |                 |                        |
| HAPIEE-LT    | •                                              |                 |                        |
| HAPIEE-PL    | •                                              |                 |                        |
| HAPIEE-RU    | •                                              |                 |                        |
| IMPROVE      | n/a                                            | n/a             | n/a                    |
| InterAct     | •                                              | •               | •                      |
| JUPITER      |                                                | •               | •                      |
| KORAgen      |                                                |                 |                        |
| MESA         | •                                              |                 | •                      |
| MRC NSHD     | n/a                                            | n/a             | n/a                    |
| NPHS-II      | •                                              | •               |                        |
| PROSPER      |                                                | •               | •                      |
| Rotterdam    | -                                              | -               | -                      |
| SMART        | n/a                                            | n/a             | n/a                    |
| TPT          |                                                | •               |                        |
| WGHS         | •                                              | •               | -                      |
| WHI          | •                                              |                 |                        |
| Whitehall II | •                                              | •               | •                      |
| WTCCC        | -                                              | -               | -                      |

Abbreviations: n/a - T2D data not included in analysis; - - T2D definition information unavailable



**Supplementary Table 6 – Associations of HMGR rs17238484 with biomarkers and T2D risk in pre-specified subgroups.**

P-values are for meta-regression between subgroup strata.

| Biomarker                | Tertiles of non-HDL-C     |                           |                           | Meta-regression p-value |
|--------------------------|---------------------------|---------------------------|---------------------------|-------------------------|
|                          | Low                       | Mid                       | High                      |                         |
|                          | Estimate (95% CI)         |                           |                           |                         |
| LDL-C (mmol/L)           | -0.013 (-0.022 to -0.004) | -0.013 (-0.021 to -0.006) | -0.034 (-0.047 to -0.020) | 0.055                   |
| Plasma glucose (%)       | 1.658 (-0.386 to 3.744)   | 2.364 (0.281 to 4.490)    | 1.923 (-0.201 to 4.092)   | 0.855                   |
| Plasma insulin (%)       | 4.628 (1.451 to 7.905)    | 3.761 (0.625 to 6.995)    | 2.884 (-0.089 to 5.946)   | 0.445                   |
| BMI (kg/m <sup>2</sup> ) | 0.035 (0.018 to 0.052)    | 0.035 (0.018 to 0.052)    | 0.029 (0.012 to 0.045)    | 0.596                   |
| Body weight (kg)         | 0.032 (0.013 to 0.050)    | 0.042 (0.024 to 0.060)    | 0.020 (0.002 to 0.037)    | 0.354                   |

| Biomarker                | Lipid-lowering drug use   |                           | Meta-regression p-value |
|--------------------------|---------------------------|---------------------------|-------------------------|
|                          | Users                     | Non-users                 |                         |
|                          | Estimate (95% CI)         |                           |                         |
| LDL-C (mmol/L)           | -0.044 (-0.072 to -0.016) | -0.075 (-0.088 to -0.062) | 0.122                   |
| Plasma glucose (%)       | 1.531 (-1.460 to 4.613)   | 0.773 (-0.909 to 2.483)   | 0.671                   |
| Plasma insulin (%)       | 5.265 (0.562 to 10.189)   | 2.987 (0.424 to 5.615)    | 0.423                   |
| BMI (kg/m <sup>2</sup> ) | 0.039 (0.013 to 0.065)    | 0.025 (0.013 to 0.038)    | 0.349                   |
| Body weight (kg)         | 0.035 (0.008 to 0.062)    | 0.023 (0.010 to 0.036)    | 0.448                   |
| T2D (odds ratio)         | 0.981 (0.890 to 1.082)    | 1.038 (0.985 to 1.094)    | 0.316                   |

| Biomarker                | BMI classes               |                           |                           | Meta-regression p-value |
|--------------------------|---------------------------|---------------------------|---------------------------|-------------------------|
|                          | Normal (<25)              | Overweight (25-30)        | Obese (>30)               |                         |
|                          | Estimate (95% CI)         |                           |                           |                         |
| LDL-C (mmol/L)           | -0.073 (-0.090 to -0.056) | -0.059 (-0.076 to -0.043) | -0.070 (-0.092 to -0.048) | 0.247                   |
| Plasma glucose (%)       | 1.631 (0.033 to 3.254)    | 0.199 (-1.565 to 1.994)   | 1.126 (-1.935 to 4.282)   | 0.249                   |
| Plasma insulin (%)       | 2.558 (0.136 to 5.039)    | -0.130 (-2.622 to 2.426)  | 2.488 (-1.422 to 6.552)   | 0.150                   |
| BMI (kg/m <sup>2</sup> ) | -                         | -                         | -                         | -                       |
| Body weight (kg)         | 0.007 (-0.003 to 0.017)   | 0.011 (0.002 to 0.021)    | 0.007 (-0.012 to 0.026)   | 0.538                   |

| Biomarker                | Sex                       |                           | Meta-regression p-value |
|--------------------------|---------------------------|---------------------------|-------------------------|
|                          | Male                      | Female                    |                         |
|                          | Estimate (95% CI)         |                           |                         |
| LDL-C (mmol/L)           | -0.065 (-0.079 to -0.051) | -0.061 (-0.076 to -0.046) | 0.909                   |
| Plasma glucose (%)       | 0.881 (-0.823 to 2.613)   | 2.097 (0.326 to 3.900)    | 0.346                   |
| Plasma insulin (%)       | 2.054 (-0.495 to 4.668)   | 2.868 (0.350 to 5.450)    | 0.665                   |
| BMI (kg/m <sup>2</sup> ) | 0.019 (0.007 to 0.031)    | 0.032 (0.017 to 0.046)    | 0.197                   |
| Body weight (kg)         | 0.022 (0.009 to 0.034)    | 0.026 (0.012 to 0.039)    | 0.650                   |

| Biomarker                | T2D cases/controls        |                           | Meta-regression p-value |
|--------------------------|---------------------------|---------------------------|-------------------------|
|                          | Cases                     | Controls                  |                         |
|                          | Estimate (95% CI)         |                           |                         |
| LDL-C (mmol/L)           | -0.051 (-0.085 to -0.016) | -0.065 (-0.077 to -0.053) | 0.570                   |
| Plasma glucose (%)       | -2.704 (-7.494 to 2.335)  | 0.698 (-0.306 to 1.712)   | 0.199                   |
| Plasma insulin (%)       | 0.245 (-6.159 to 7.086)   | 1.945 (0.012 to 3.915)    | 0.637                   |
| BMI (kg/m <sup>2</sup> ) | 0.022 (-0.011 to 0.055)   | 0.024 (0.013 to 0.035)    | 0.906                   |
| Body weight (kg)         | -0.003 (-0.035 to 0.030)  | 0.024 (0.012 to 0.035)    | 0.136                   |

Supplementary Table 7 – Associations of *HMGCR* rs12916 with plasma lipids, T2D-related biomarkers and T2D risk – fixed effects meta-analysis

| Biomarker                  | Total n (studies)                      | rs12916                      |                  | Effect p-value         | I <sup>2</sup>       | Heterogeneity p-value        |
|----------------------------|----------------------------------------|------------------------------|------------------|------------------------|----------------------|------------------------------|
|                            |                                        | Per-allele effect            | 95% CI           |                        |                      |                              |
| Total cholesterol (mmol/L) | 40,712 (15)                            | -0.077                       | -0.091 to -0.062 | 4.74x10 <sup>-25</sup> | 27.5                 | 0.15                         |
| LDL-C (mmol/L)             | 32,674 (13)                            | -0.083                       | -0.098 to -0.068 | 4.40x10 <sup>-28</sup> | 33.3                 | 0.12                         |
| Non-HDL-C (mmol/L)         | 39,591 (15)                            | -0.074                       | -0.089 to -0.059 | 9.50x10 <sup>-22</sup> | 28.2                 | 0.15                         |
| Plasma insulin (%)         | 19,918 (7)                             | 0.659                        | -0.631 to 1.967  | 0.318                  | 44.4                 | 0.10                         |
| Plasma glucose (%)         | 30,641 (12)                            | 0.125                        | -0.135 to 0.387  | 0.35                   | 0.0                  | 0.54                         |
| Body weight (kg)           | 65,871 (15)                            | 0.203                        | 0.043 to 0.362   | 0.01                   | 0.0                  | 0.84                         |
| BMI (kg/m <sup>2</sup> )   | 75,140 (17)                            | 0.083                        | 0.031 to 0.135   | 1.62x10 <sup>-3</sup>  | 0.0                  | 0.90                         |
| Height (m)                 | 39,771, (14)                           | 0.0001                       | -0.001 to 0.001  | 0.77                   | 0                    | 0.67                         |
| Waist circumference (cm)   | 30,313 (11)                            | 0.303                        | 0.102 to 0.504   | 0.003                  | 0                    | 0.55                         |
| Hip circumference (cm)     | 30,313 (11)                            | 0.193                        | 0.050 to 0.337   | 8.07x10 <sup>-3</sup>  | 28.6                 | 0.17                         |
| <b>Outcome</b>             | <b>No. of cases/controls (studies)</b> | <b>Per-allele odds ratio</b> | <b>95% CI</b>    | <b>Effect p-value</b>  | <b>I<sup>2</sup></b> | <b>Heterogeneity p-value</b> |
| T2D                        | 14,976/73,574 (16)                     | 1.06                         | 1.03 to 1.09     | 9.58x10 <sup>-5</sup>  | 36.7                 | 0.07                         |

**Supplementary Table 8 - Associations of rs17238484 and rs12916 with T2D-related biomarkers and T2D risk - random effects meta-analyses**

| <b>rs17238484</b> | <b>Biomarker</b>           | <b>No. of individuals (studies)</b>    | <b>Per-allele beta coefficient</b> | <b>95% confidence interval</b> | <b>Effect p-value</b>  |
|-------------------|----------------------------|----------------------------------------|------------------------------------|--------------------------------|------------------------|
|                   | LDL-C (mmol/L)             | 101,919 (26)                           | -0.065                             | -0.077 to -0.052               | 6.20x10 <sup>-25</sup> |
|                   | Total cholesterol (mmol/L) | 117,545 (30)                           | -0.067                             | -0.079 to -0.055               | 4.60x10 <sup>-30</sup> |
|                   | Non-HDL-C (mmol/L)         | 103,375 (27)                           | -0.067                             | -0.081 to -0.053               | 1.20x10 <sup>-21</sup> |
|                   | Body weight (kg)           | 143,113 (30)                           | 0.301                              | 0.175 to 0.428                 | 3.20x10 <sup>-6</sup>  |
|                   | BMI (kg/m <sup>2</sup> )   | 152,004 (32)                           | 0.105                              | 0.066 to 0.145                 | 1.80x10 <sup>-7</sup>  |
|                   | Height (m)                 | 77,291 (23)                            | 0.001                              | -0.000 to 0.002                | 0.23                   |
|                   | Waist circumference (cm)   | 69,163 (19)                            | 0.315                              | 0.158 to 0.472                 | 8.30x10 <sup>-5</sup>  |
|                   | Hip circumference (cm)     | 69,159 (19)                            | 0.211                              | 0.101 to 0.321                 | 1.70x10 <sup>-4</sup>  |
|                   | Plasma glucose (%)         | 73,490 (23)                            | 0.230                              | 0.020 to 0.441                 | 0.03                   |
|                   | Plasma insulin (%)         | 37,453 (12)                            | 0.016                              | 0.005 to 0.027                 | 3.60x10 <sup>-3</sup>  |
|                   | <b>Outcome</b>             | <b>No. of cases/controls (studies)</b> | <b>Odds ratio</b>                  | <b>95% confidence interval</b> | <b>p-value</b>         |
|                   | T2DM                       | 26,236/164,021 (35)                    | 1.02                               | 1.00 to 1.04                   | 0.10                   |

  

| <b>rs12916</b> | <b>Biomarker</b>           | <b>No. of individuals (studies)</b>    | <b>Per-allele beta coefficient</b> | <b>95% confidence interval</b> | <b>Effect p-value</b>  |
|----------------|----------------------------|----------------------------------------|------------------------------------|--------------------------------|------------------------|
|                | LDL-C (mmol/L)             | 32,674 (13)                            | -0.081                             | -0.101 to -0.062               | 5.50x10 <sup>-16</sup> |
|                | Total cholesterol (mmol/L) | 40,712 (15)                            | -0.075                             | -0.093 to -0.057               | 7.20x10 <sup>-16</sup> |
|                | Non-HDL-C (mmol/L)         | 39,591 (15)                            | -0.072                             | -0.091 to -0.053               | 8.10x10 <sup>-14</sup> |
|                | Body weight (kg)           | 65,871 (15)                            | 0.203                              | 0.043 to 0.362                 | 0.01                   |
|                | BMI (kg/m <sup>2</sup> )   | 75,140 (17)                            | 0.083                              | 0.031 to 0.135                 | 1.60x10 <sup>-3</sup>  |
|                | Waist circumference (cm)   | 39,771 (14)                            | 0.000                              | -0.001 to 0.001                | 0.77                   |
|                | Hip circumference (cm)     | 30,313 (11)                            | 0.303                              | 0.102 to 0.504                 | 3.10x10 <sup>-3</sup>  |
|                | Plasma glucose (%)         | 30,313 (11)                            | 0.195                              | 0.008 to 0.382                 | 0.04                   |
|                | Plasma insulin (%)         | 30,641 (12)                            | 0.130                              | -0.140 to 0.391                | 0.35                   |
|                | Height (m)                 | 19,918 (7)                             | 0.004                              | -0.016 to 0.023                | 0.72                   |
|                | <b>Outcome</b>             | <b>No. of cases/controls (studies)</b> | <b>Odds ratio</b>                  | <b>95% confidence interval</b> | <b>p-value</b>         |
|                | T2DM                       | 14,976/73,574 (16)                     | 1.07                               | 1.02 to 1.12                   | 1.10x10 <sup>-3</sup>  |

**Supplementary Table 9 – Effect of statin therapy on body weight and new-onset T2D risk– fixed effects meta-analysis**

| <b>Trials</b>                         | <b>Weight change (kg)</b> | <b>95 % CI</b> |
|---------------------------------------|---------------------------|----------------|
| Placebo- or standard care- controlled | 0.33                      | 0.26 to 0.41   |
| Intensive vs moderate dose            | -0.08                     | -0.16 to 0.01  |
| All trials combined                   | 0.16                      | 0.11 to 0.22   |

| <b>Trials</b>                         | <b>T2D Odds Ratio</b> | <b>95 % CI</b> |
|---------------------------------------|-----------------------|----------------|
| Placebo- or standard care- controlled | 1.12                  | 1.05 to 1.19   |
| Intensive vs moderate dose            | 1.12                  | 1.04 to 1.22   |
| All trials combined                   | 1.12                  | 1.07 to 1.17   |

**Supplementary Table 10 – Associations of *HMGCR* rs17238484 and rs12916 with T2D risk in 35 studies contributing to this analysis, and in combination with data from GWA study data from the DIAGRAM consortium**

|                                                           | <b>rs17238484-G</b><br>OR (95% CI) | Cases/controls or total<br>n (studies) | <b>rs12916-T</b><br>OR (95% CI) | Cases/controls or total<br>n (studies) |
|-----------------------------------------------------------|------------------------------------|----------------------------------------|---------------------------------|----------------------------------------|
| <i>Risk of T2D: original studies</i>                      | 1.02 (1.00 to 1.05)                | 26,236/164,021 (35)                    | 1.06 (1.03 to 1.09)             | 14,976/73,574 (16)                     |
| <i>Risk of T2D: Morris GWAS+MetaboChip analysis</i>       | 1.03 (0.99 to 1.06)                | 51,943 (19)*                           | 1.01 (0.99 to 1.04)             | 76,774 (19)*                           |
| <i>Risk of T2D: original studies + unique Morris data</i> | 1.03 (1.01 to 1.06)                | 181,111 (38)*                          | 1.02 (1.00 to 1.04)             | 151,329 (38)*                          |

*Estimates shown are derived from i) 35 observational population studies contributing to the current analysis; ii) Morris et al. GWAS+MetaboChip studies consortium; iii) meta-analysis of original studies and studies contributing to the current analysis combined with the remaining studies unique to the Morris et al. consortium.*

*Effective sample size as reported by the DIAGRAM consortium at <http://diagram-consortium.org/downloads.htm>*

*\*Numbers of cases and controls unavailable from Morris et al. data*

**Supplementary Figure 1 - Associations of SNPs at the *HMGCR* locus with LDL-C concentration and liver gene expression**

The x-axis shows the physical position on chromosome 5 (Mb). Each dot represents one variant (SNP or indel - imputed or directly typed). Upper panel graph y-axis uses p-values from a published meta-analysis of LDL-C levels in >100,000 individuals<sup>50</sup>. Lower panel y-axis shows the  $-\log_{10}$ p-value for association with *HMGCR* gene expression in liver. The posterior probability ("Post P") that LDL-C co-localises with *HMGCR* liver expression is shown on top of the graph. There is a high probability that *HMGCR* expression is mediating the LDL-C signal.

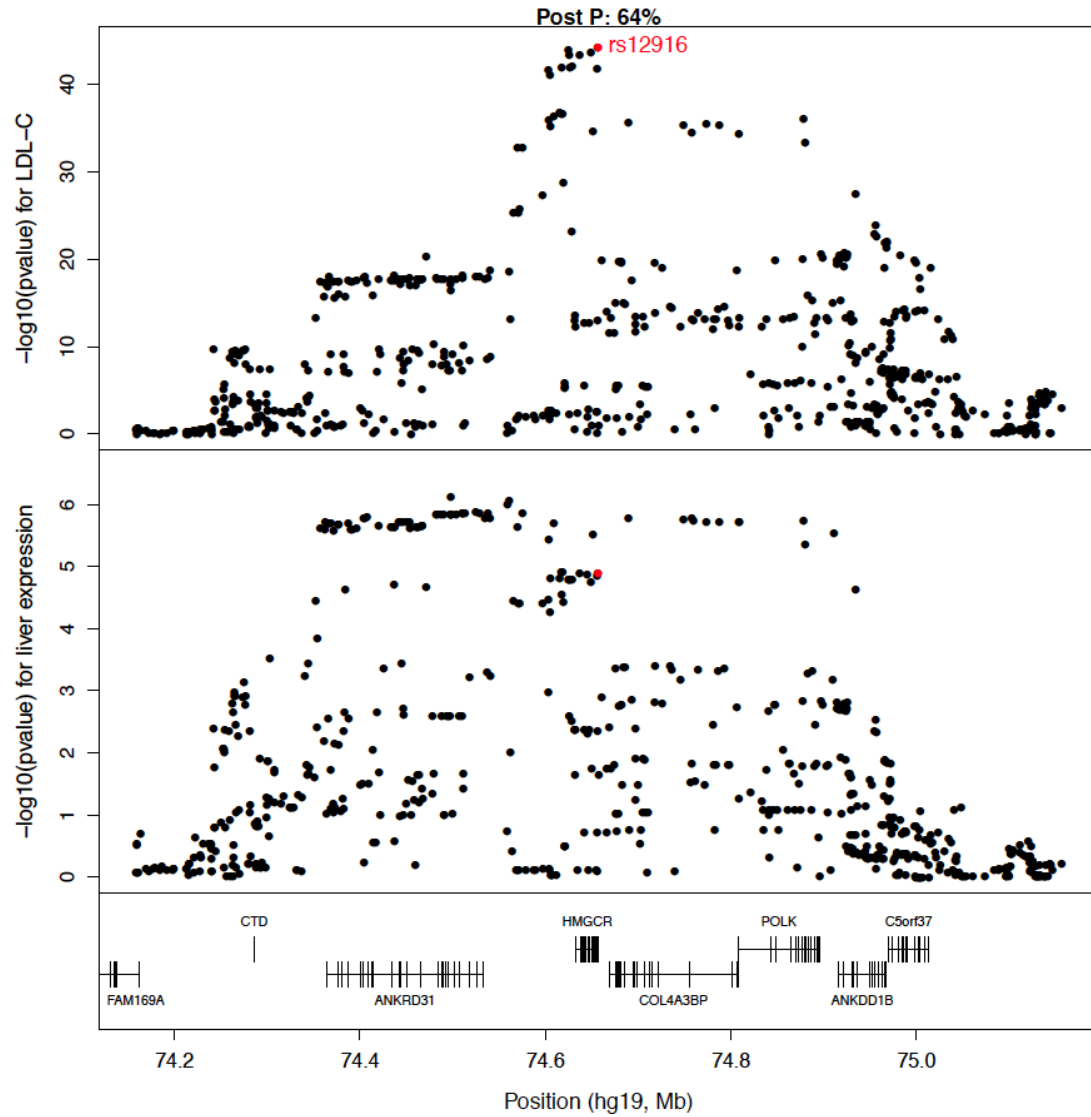

**Supplementary Figure 2 - Effect of HMGR rs12916 genotype on liver expression of HMGR**  
946 individuals had expression measurements and genotypes that were directly typed or imputed (uncertain genotypes were removed). The allele T of the SNP rs12916 is associated with a decreased effect of HMGR expression in liver (1-d.f.  $p=1.3 \times 10^{-5}$ ).

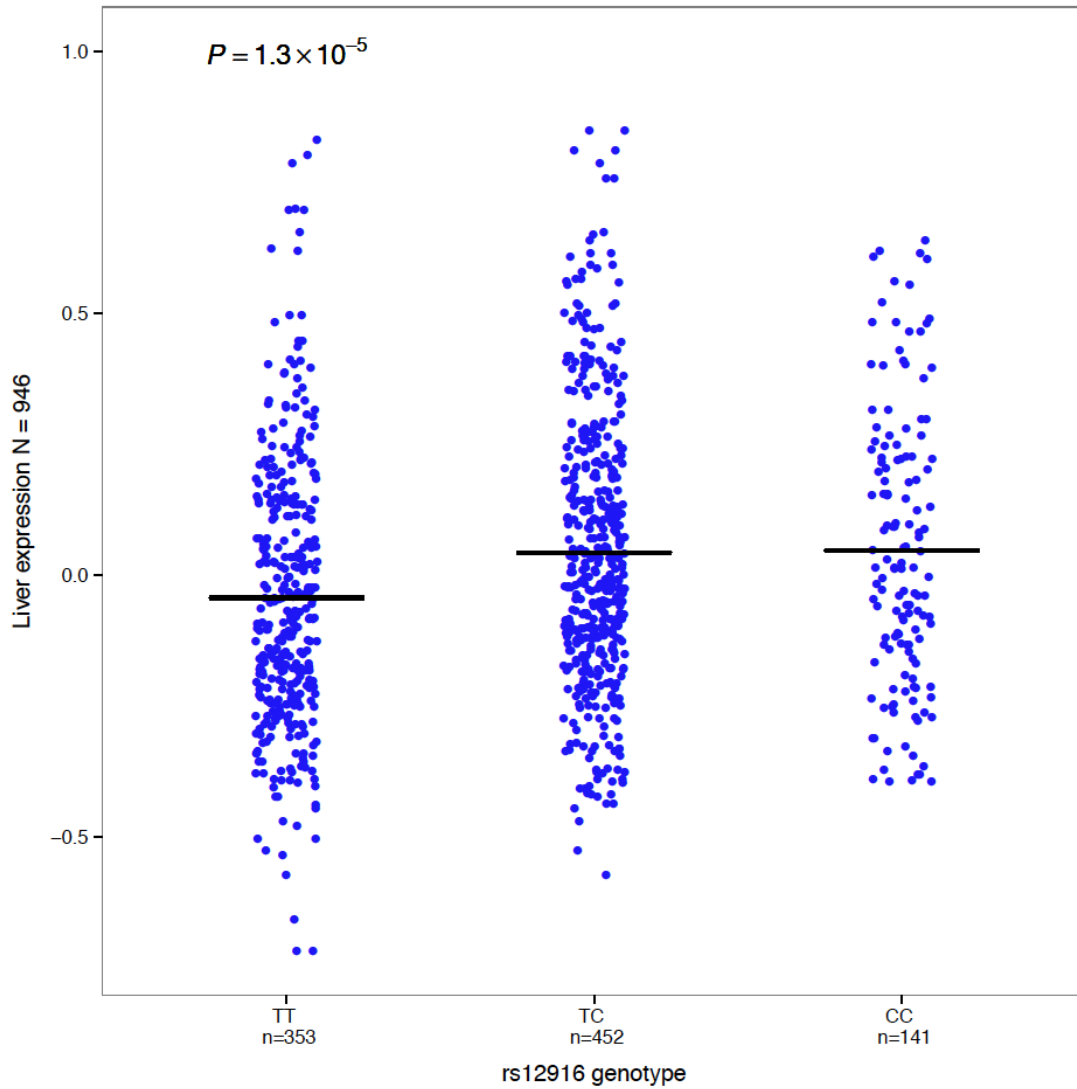

Supplementary Figure 3 - Genetic analysis biomarker data - box and whisker plots

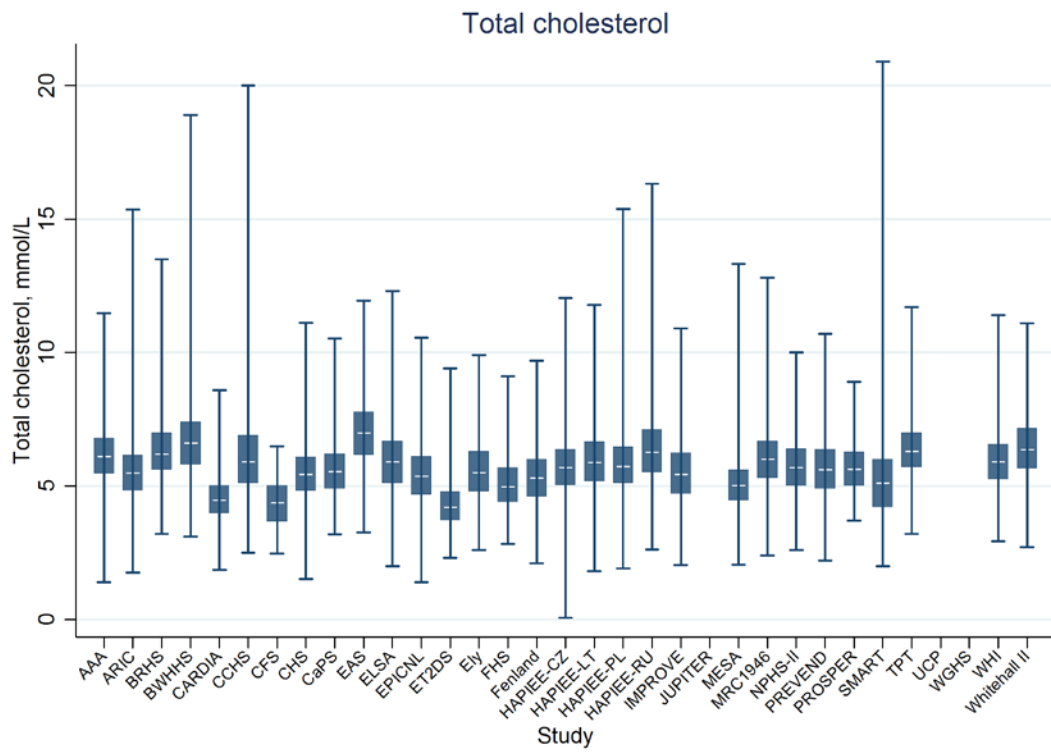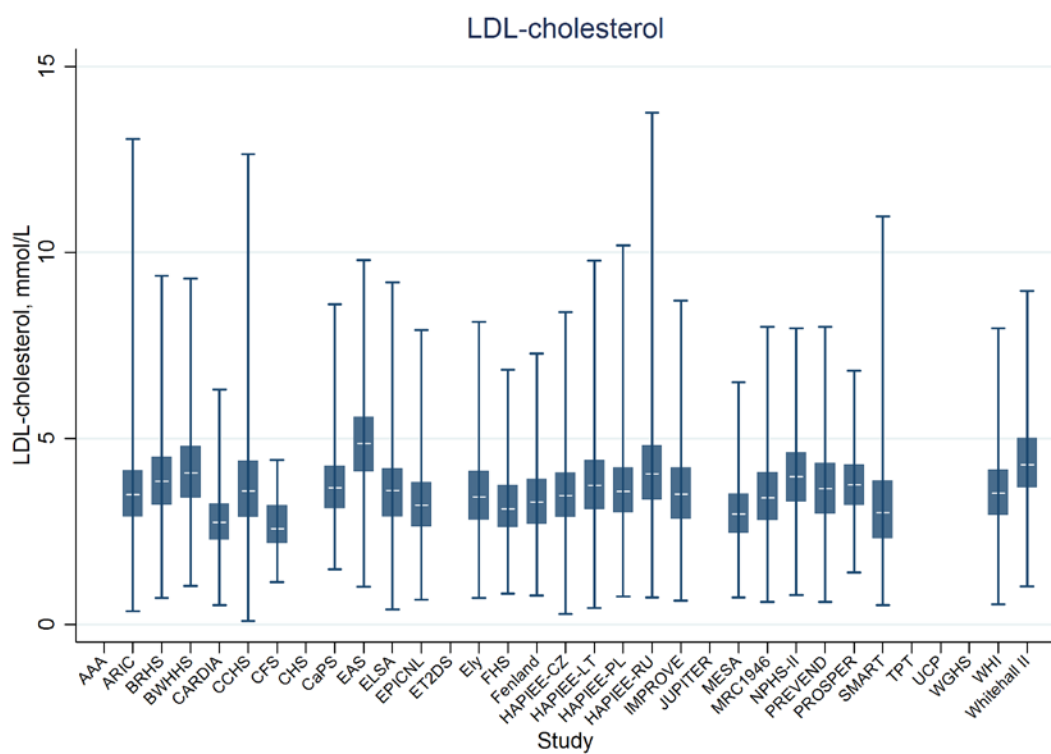



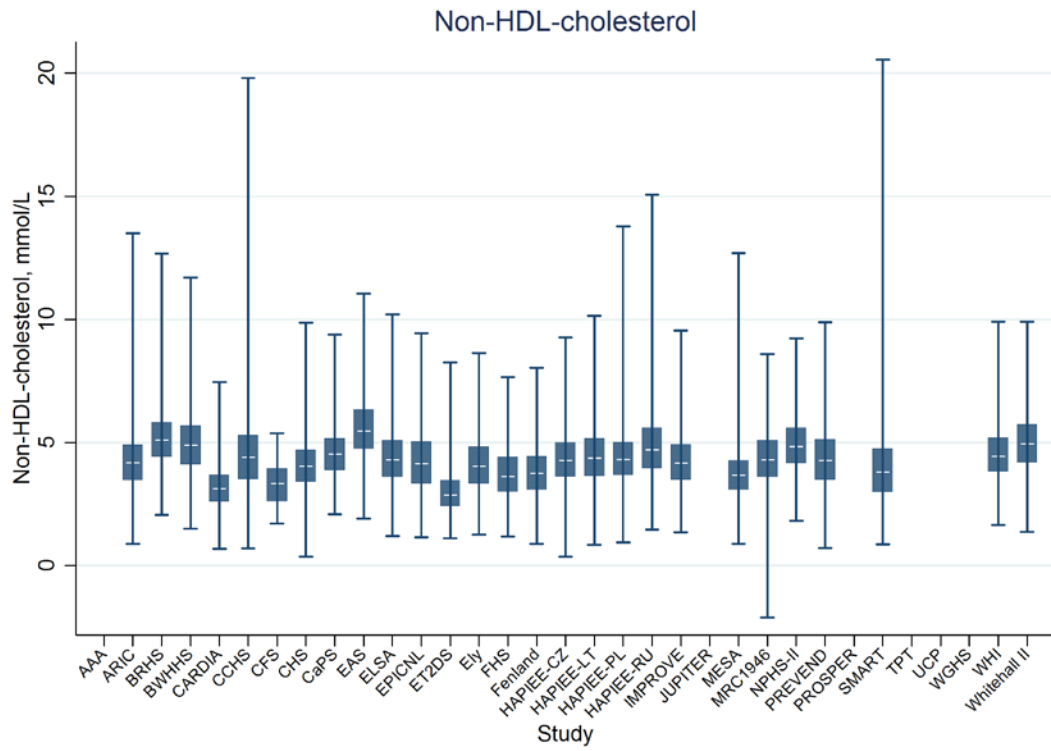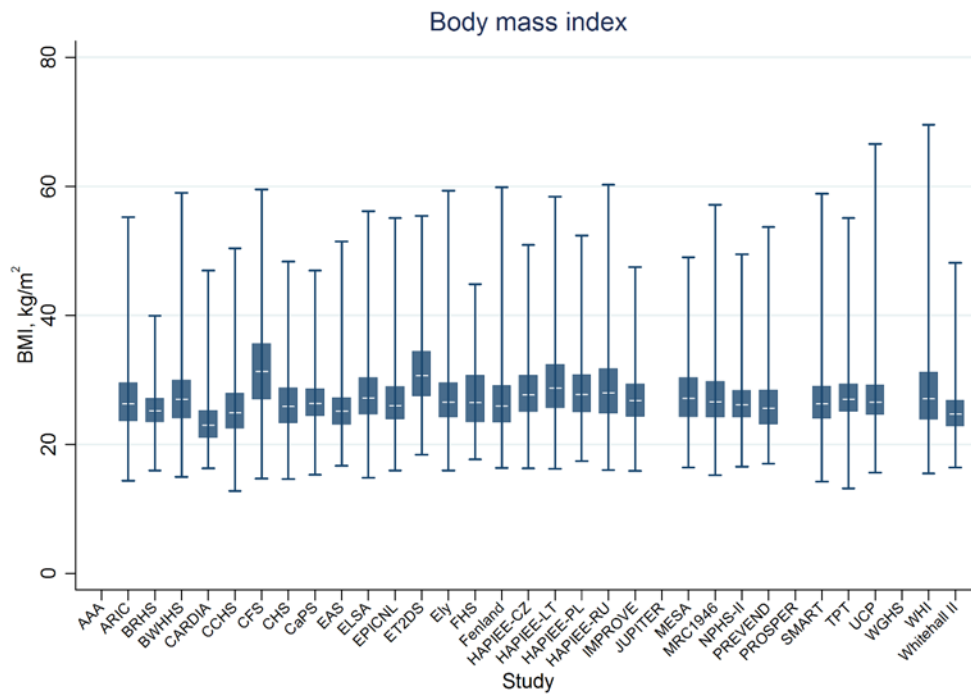

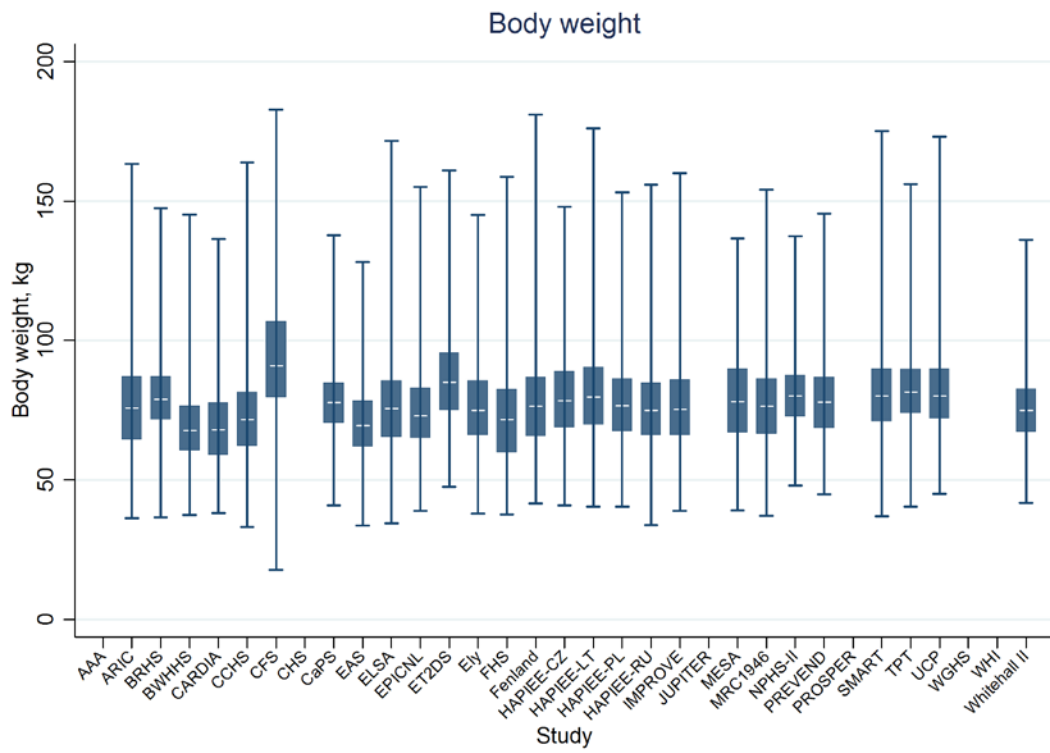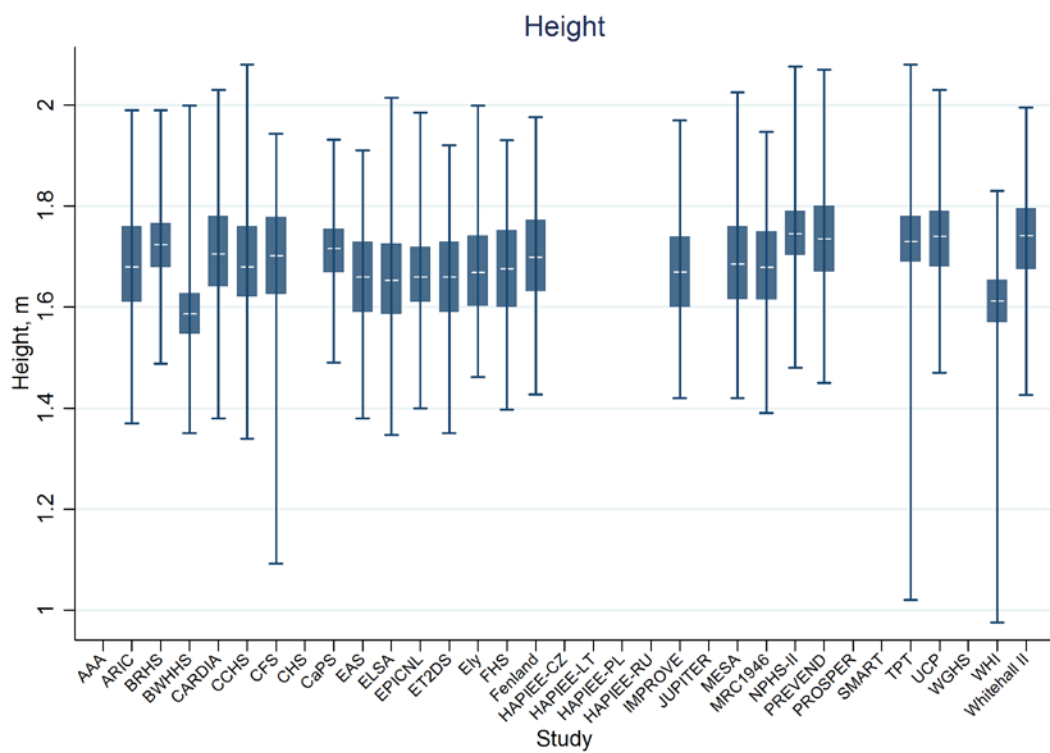

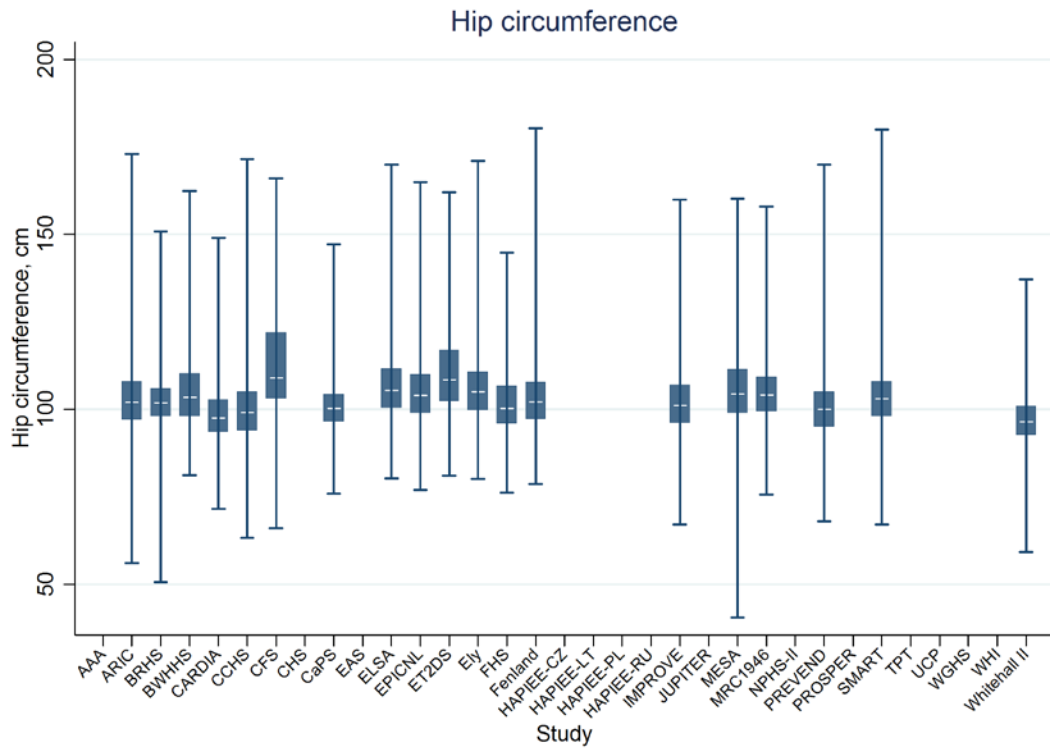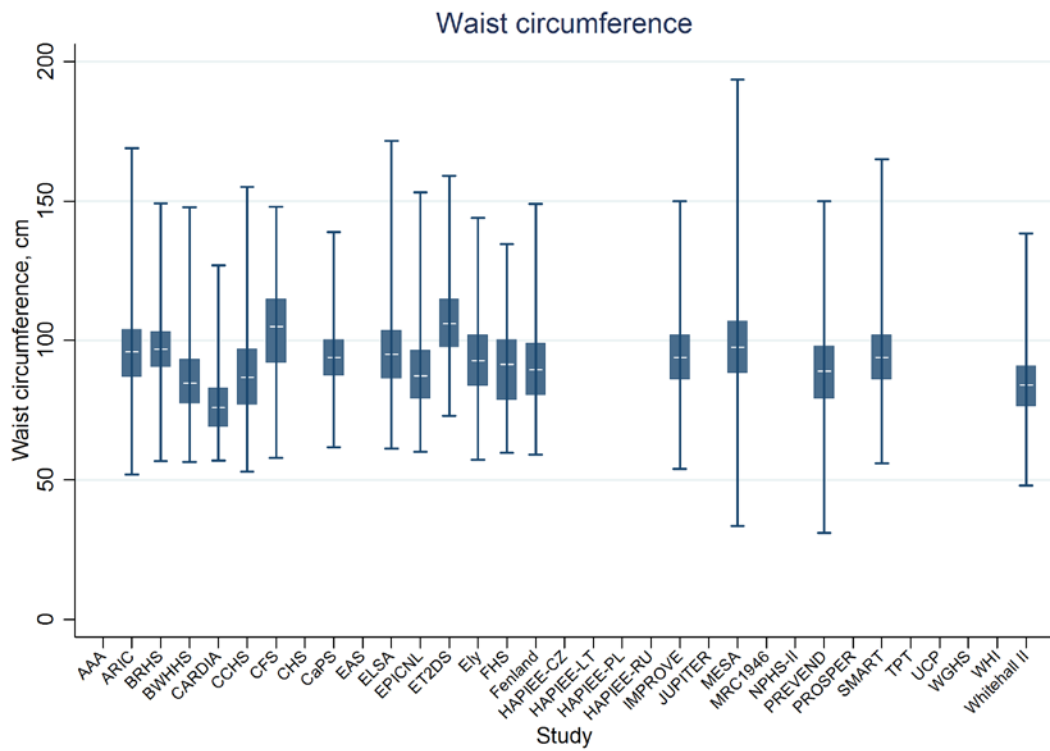

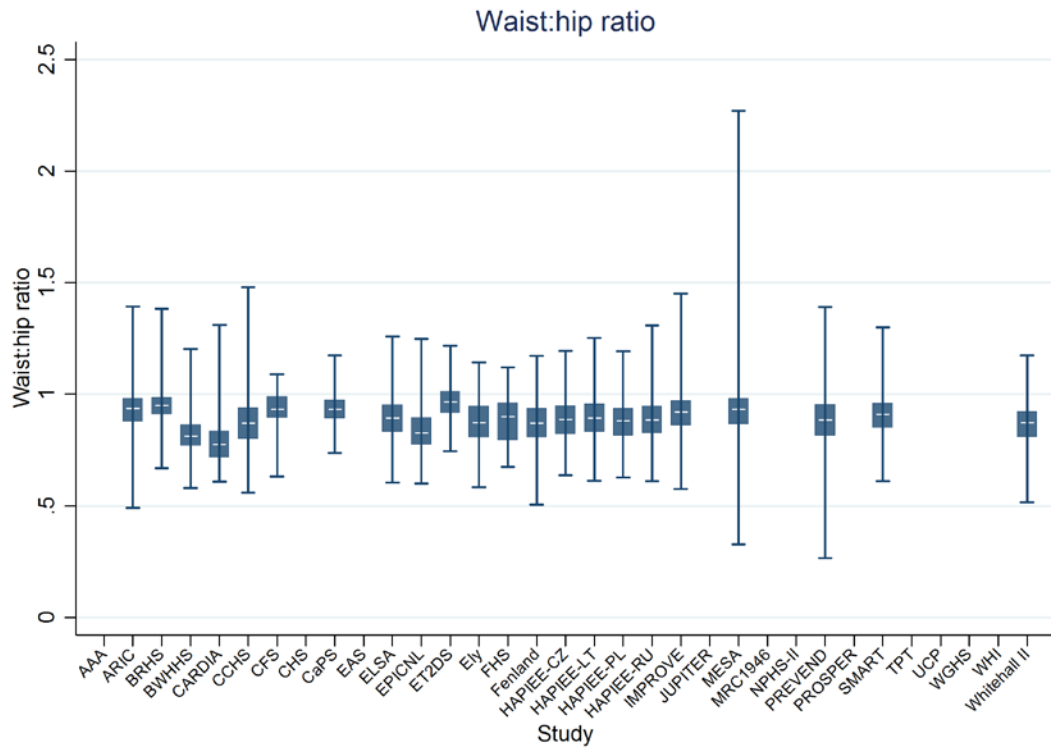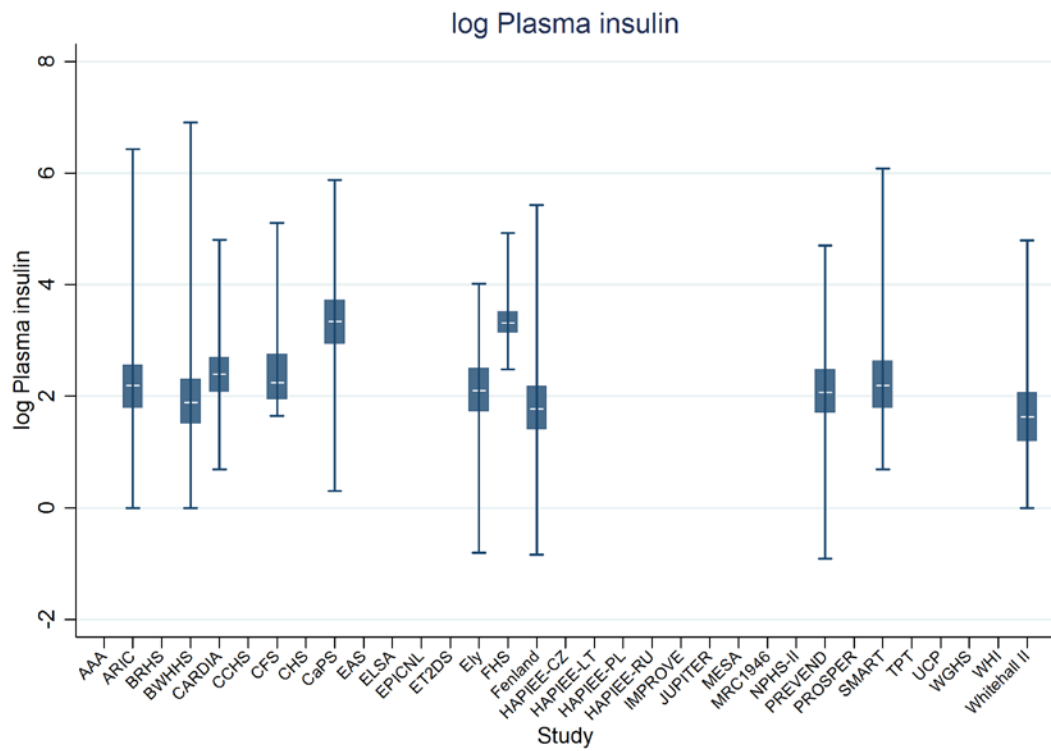

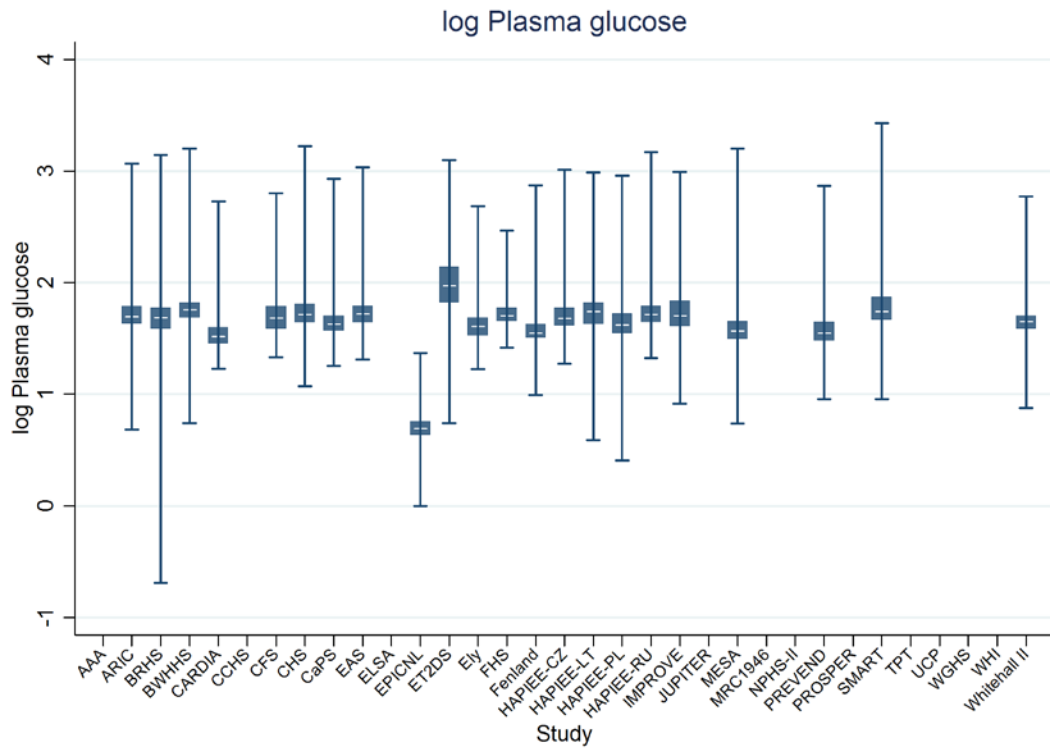

**Supplementary Figure 4 – Meta-regression model of the relationship between new-onset diabetes and percentage LDL-C reduction in statin trials at 1 year**

20 trials, meta-regression  $p=0.10$ . Shaded area represents 95% confidence interval. The size of markers is determined by the standard error of the within-trial estimate of T2D odds ratio.

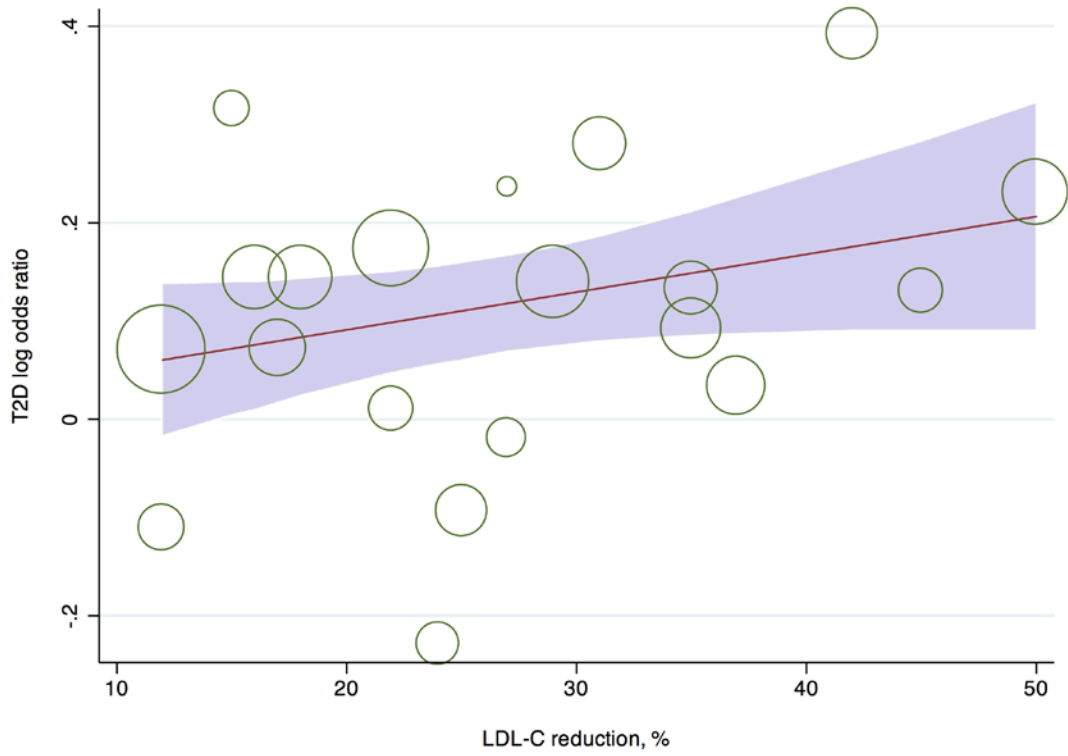

**Supplementary Figure 5 –Meta-regression model of the relationship between change in weight and relative change in LDL-C in statin trials at 1 year**

15 trials, meta-regression  $p=0.58$ . Shaded area represents 95% confidence interval. The size of markers is determined by the standard error of within-trial estimates of weight change.

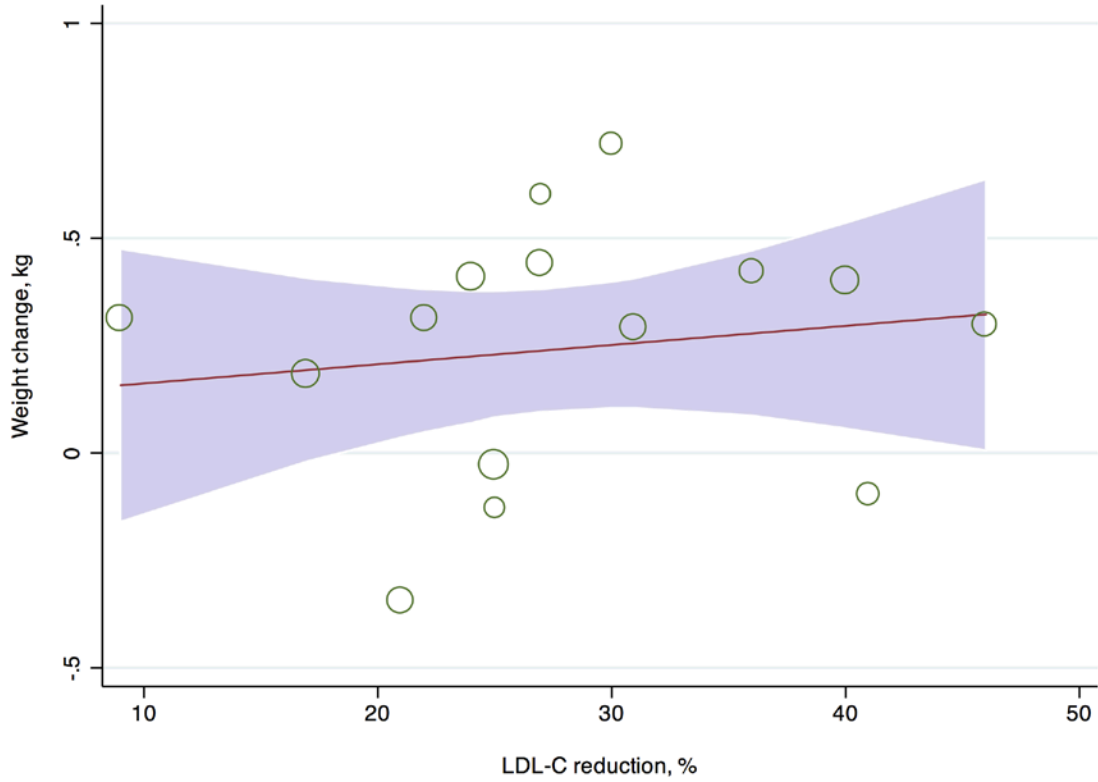

Supplement: mmc1.pdf [file mmc1.pdf]
